# Supplementary material for: Use of a Patient-Friendly Terms List in the Adverse Drug Reaction Report Form: A Database Study
Source: PubMed Central journal article supplement — Drug Saf. 2019 Feb 6;42(7):881–6. doi: 10.1007/s40264-019-00800-x (PMC6581931; doi:10.1007/s40264-019-00800-x), 2019-02-06
Supplement: 40264_2019_800_MOESM1_ESM.pdf [file 40264_2019_800_MOESM1_ESM.pdf]

# *Drug Safety*

## **Use of a patient-friendly terms list in the adverse drug reaction report form: A database study**

*Sieta T. de Vries, PhD<sup>1</sup>; Judy Harrison, MD<sup>2</sup>; Patrick Revelle<sup>2</sup>; Alicia Ptaszynska-Neophytou<sup>3</sup>; Anna Radecka<sup>3</sup>; Gowthamei Ragunathan<sup>3</sup>; Phil Tregunno<sup>3</sup>; Petra Denig, PhD<sup>1</sup>; Peter G.M. Mol, PhD<sup>1,4</sup>*

<sup>1</sup> *University of Groningen, University Medical Center Groningen, Department of Clinical Pharmacy and Pharmacology, Groningen, The Netherlands*

<sup>2</sup> *MedDRA Maintenance and Support Services Organization (MSSO)*

<sup>3</sup> *Medicines and Healthcare products Regulatory Agency (MHRA)*

<sup>4</sup> *Dutch Medicines Evaluation Board, Utrecht, The Netherlands*

✉ [p.g.m.mol@umcg.nl](mailto:p.g.m.mol@umcg.nl)

---

## **Supplemental Digital Content**

This Supplemental Digital Content contains the appendix referred to in the full version of this article, which can be found at <http://adisonline.com/drugsafety>

## Electronic Supplementary Material 1. Description of a small pilot study

In a small pilot study, 4 patients from the EURORDIS UK network or the Patient Group Consultative Forum (PGCF) completed a survey about their views on the use of patient-friendly terms in the adverse drug reaction (ADR) report form. The age of these patients ranged from 27 to 72 and three patients were male.

All patients indicated that they would prefer to describe the ADR in their own words rather than selecting a term from a list. They indicated that they can provide more accurate information when describing the ADR themselves and that this will not confront them with medical terms:

- *“I think by describing the side effects myself I can describe things better and more accurately”*
- *“I’d prefer to describe it in my own words as I’ve limited medical knowledge of terms and jargon”*
- *“Don’t see that a list would be helpful to me personally because I am capable of adequately explaining symptoms and expressing how I feel..... generally I know when I am feeling terrible and can figure out what could/might be a cause. Maybe some people can’t explain how they are feeling and prefer a list. This may be desirable where English isn’t first language and patients don’t know how to explain”*
- *“Side-effects can affect patients very differently, and there are so many variables that a tick-box multiple choice approach could be limiting at best, and inaccurate at worst”*

A patient indicated that the use of standard terms in the ADR report form could be a good idea for people who cannot express themselves. Other patients mentioned that the use of standard terms should be presented in non-medical terms and that there should be an option to fully describe the ADR and an option to report ADRs that are not in the list.

In the same survey, the patients evaluated the understandability of a sample of terms from the patient-friendly terms list. They were asked to indicate for each term whether the term was in their opinion clear/unclear and whether the term would be clear/unclear for other people they know. In addition, they could indicate any suggestions for improving each term or they could add any

comments. The selected terms were mainly terms considered by MSSO as *potentially difficult* terms for patients but contained also a sample of terms that were considered *probably understandable*. A total of 123 patient-friendly terms (i.e. 114 potentially difficult and 9 probably understandable terms) were evaluated by a patient:

Of the 114 potentially difficult terms:

- 60 terms were *unclear* for the patient and considered to be *unclear* for other people;
- 36 terms were *clear* for the patient and considered to be *clear* for other people;
- 17 terms were *clear* for the patient but considered to be *unclear* for other people;
- 1 term was *unclear* for the patient and an evaluation for other people was lacking.

|                      |         | Other people |       |
|----------------------|---------|--------------|-------|
|                      |         | Unclear      | Clear |
| Patient him-/herself | Unclear | 60           | 0     |
|                      | Clear   | 17           | 36    |

A)<sup>1</sup>

Of the 9 probably understandable terms:

- 2 terms were *unclear* for the patient and considered *unclear* for other people;
- 7 terms were *clear* for the patient and considered *clear* for other people.

|                      |         | Other people |       |
|----------------------|---------|--------------|-------|
|                      |         | Unclear      | Clear |
| Patient him-/herself | Unclear | 2            | 0     |
|                      | Clear   | 0            | 7     |

B)

**Figure.** Patients' evaluation of a selection of **A)** potentially difficult terms, and **B)** probably understandable terms. <sup>1</sup> One term is missing since there was an evaluation for the patient him-/herself but not for other people.

A few suggestions for improving the terms were given (see Table below).

In conclusion, patients seem to prefer to describe an experienced ADR in their own words rather than selecting a term from a list. The currently available patient-friendly terms list needs to be further improved to better represent lay-terms.

### Overview of evaluated potentially difficult terms

| LLT                           | LLT code | Your opinion |       | For other people |       | Suggestions for improvement                       |
|-------------------------------|----------|--------------|-------|------------------|-------|---------------------------------------------------|
|                               |          | Unclear      | Clear | Unclear          | Clear |                                                   |
| Abdominal abscess             | 10060921 | x            |       | x                |       |                                                   |
| Abnormal liver function tests | 10000158 | x            |       | x                |       | Wouldn't know how you know this without a test    |
| Accidental overdose           | 10000381 |              | x     | x                |       | Taken too many by mistake                         |
| Acute myeloid leukaemia       | 10000880 | x            |       | x                |       |                                                   |
| ADHD                          | 10064104 |              | x     |                  | x     |                                                   |
| Agoraphobia                   | 10001502 |              | x     |                  | x     |                                                   |
| Alcohol interaction           | 10001597 |              | x     | x                |       | Had alcohol with medication                       |
| Alertness decreased           | 10049875 |              | x     |                  | x     |                                                   |
| Application site papules      | 10049043 | x            |       | x                |       |                                                   |
| Atrial flutter                | 10003662 | x            |       | x                |       | Heart flutter/palpitations                        |
| Auditory hallucinations       | 10003785 |              | x     |                  | x     |                                                   |
| Axillary pain                 | 10048750 | x            |       | x                |       |                                                   |
| Blood glucose increased       | 10005557 |              | x     |                  | x     |                                                   |
| Blood sugar decreased         | 10005808 | x            |       | x                |       | Don't know how I would know blood sugar decreased |
| Bone density decreased        | 10049470 |              | x     | x                |       |                                                   |
| Bone fragile                  | 10005966 |              | x     |                  | x     |                                                   |
| Bone loss                     | 10065687 |              | x     |                  | x     |                                                   |
| Breakthrough pain             | 10064556 | x            |       | x                |       |                                                   |
| Candida infection             | 10074170 | x            |       | x                |       |                                                   |
| Cardiopulmonary failure       | 10051093 | x            |       | x                |       | Could be indigestion?                             |
| Cholesterol levels raised     | 10008663 |              | x     |                  | x     |                                                   |
| Clavicle fracture             | 10009245 | x            |       | x                |       |                                                   |
| Clot blood                    | 10009667 | x            |       | x                |       |                                                   |

|                             |          |   |   |  |   |                                                                                      |
|-----------------------------|----------|---|---|--|---|--------------------------------------------------------------------------------------|
| Clotting disorder           | 10064732 |   | x |  | x |                                                                                      |
| Condition                   |          |   |   |  |   |                                                                                      |
| aggravated                  | 10010264 |   | x |  | x |                                                                                      |
| Deafness unilateral         | 10048812 | x |   |  | x |                                                                                      |
| Deep vein thrombosis        |          |   |   |  |   | Never having had something like this I'm not sure I would distinguish it with cramp? |
|                             | 10051055 | x |   |  | x |                                                                                      |
| Dermatitis                  | 10012431 |   | x |  |   | x                                                                                    |
| Diabetic neuropathy         | 10012680 | x |   |  | x |                                                                                      |
| Diverticulitis              | 10013538 |   | x |  | x |                                                                                      |
| Drug effect decreased       | 10013678 |   | x |  |   | x                                                                                    |
| Ectopic pregnancy           | 10014166 | x |   |  | x |                                                                                      |
| Edema                       | 10014210 | x |   |  | x |                                                                                      |
| Endometriosis               | 10014778 | x |   |  | x |                                                                                      |
| Esophagitis                 | 10015461 | x |   |  | x |                                                                                      |
| Facial bones fracture       | 10016042 |   | x |  | x | Face bone broken                                                                     |
| Fatty liver                 | 10016261 | x |   |  | x |                                                                                      |
| Femur fracture              | 10016454 | x |   |  | x |                                                                                      |
| Fistula                     | 10016717 | x |   |  | x |                                                                                      |
| Gastric disorder            | 10056819 |   | x |  | x |                                                                                      |
| Gastric perforation         | 10017815 | x |   |  | x |                                                                                      |
| GERD                        | 10018203 | x |   |  | x |                                                                                      |
| Grand mal convulsion        | 10018659 | x |   |  | x |                                                                                      |
| Guillain-Barre syndrome     | 10018767 | x |   |  | x |                                                                                      |
| Hand deformity              | 10061194 |   | x |  |   | x                                                                                    |
| Hepatitis C                 | 10019744 | x |   |  | x |                                                                                      |
| Hypertension                | 10020772 |   | x |  | x |                                                                                      |
| Hyperthyroidism             | 10020850 | x |   |  | x |                                                                                      |
| Hyperventilation            | 10020910 |   | x |  | x |                                                                                      |
| Impaired liver function     | 10021520 |   | x |  |   | x                                                                                    |
| Increased urinary frequency | 10021692 |   | x |  | x | Older people more likely to be aware of this                                         |
| Infusion site swelling      | 10053505 |   | x |  |   | x                                                                                    |
| Injection site inflammation | 10022078 |   | x |  |   | x                                                                                    |
| Iron low                    | 10022982 |   | x |  | x | Only know this following a blood test                                                |
| Laceration                  | 10023572 | x |   |  |   |                                                                                      |
| Libido decreased            | 10024419 |   | x |  |   | x                                                                                    |
| Lip disorder                | 10048470 |   | x |  |   | x                                                                                    |
| Lumbar pain                 | 10024998 |   | x |  |   | x                                                                                    |

|                     |          |   |   |   |                                                           |
|---------------------|----------|---|---|---|-----------------------------------------------------------|
| Lung cancer         |          |   |   |   |                                                           |
| metastatic          | 10050017 | x |   | x |                                                           |
| Lymphedema          | 10025233 | x |   | x |                                                           |
| Lymphoedema         | 10025282 | x |   | x |                                                           |
| Macular             |          |   |   |   |                                                           |
| degeneration        | 10025409 | x |   | x |                                                           |
| Metastases to lung  | 10027458 | x |   | x |                                                           |
| Metastases to       |          |   |   |   | Wouldn't know symptoms of this                            |
| lymph nodes         | 10027459 | x |   | x |                                                           |
| Metastasis          | 10062194 | x |   | x |                                                           |
| Movements           |          |   |   |   |                                                           |
| abnormal            | 10028039 |   | x |   | x                                                         |
| Mucous membrane     |          |   |   |   |                                                           |
| disorder            | 10028133 | x |   | x |                                                           |
| Multiple myeloma    | 10028228 | x |   | x |                                                           |
| Myalgic             |          |   |   |   |                                                           |
| encephalomyelitis   | 10028414 | x |   | x |                                                           |
| Myelodysplastic     |          |   |   |   |                                                           |
| syndrome            | 10028533 | x |   | x |                                                           |
| Necrosis            | 10028851 | x |   | x |                                                           |
| Nerve damage        |          |   |   |   | Again wouldn't be able to distinguish this from bruising? |
|                     | 10029177 | x |   | x |                                                           |
| Neuropathy          | 10029328 | x |   | x |                                                           |
| Nicotine addiction  | 10056478 |   | x |   | x                                                         |
| Oedema              | 10030095 | x |   | x |                                                           |
| Oesophageal pain    | 10030180 |   | x |   | x                                                         |
| Osteoporosis        | 10031282 |   | x |   | x                                                         |
| Patella fracture    | 10034122 |   | x | x | Broken kneecap                                            |
| Pelvic inflammatory |          |   |   |   |                                                           |
| disease             | 10034254 | x |   | x | Not sure of symptoms                                      |
| Pharyngitis         | 10034835 | x |   | x |                                                           |
| Polycystic ovaries  | 10036049 | x |   | x |                                                           |
| Polyp               | 10061529 | x |   | x |                                                           |
| Postmenopausal      |          |   |   |   |                                                           |
| bleeding            | 10036399 |   | x |   | x                                                         |
| Product quality     |          |   |   |   |                                                           |
| issue               | 10069327 | x |   | x |                                                           |
| Product size issue  | 10069249 | x |   | x |                                                           |
| Product taste       |          |   |   |   |                                                           |
| abnormal            | 10069227 |   | x |   | x                                                         |
| Psychosis           | 10037234 | x |   | x |                                                           |
| Radius fracture     | 10037802 | x |   | x |                                                           |
| Raynaud's syndrome  |          |   |   |   | Would have to look it up on google                        |
|                     | 10037914 | x |   | x |                                                           |
| Shoulder bursitis   | 10040611 | x |   | x |                                                           |
| Skin abrasion       | 10064990 |   | x |   | x                                                         |
| Skin depigmentation | 10040825 |   | x |   | x                                                         |
| Skin pigmentation   | 10040910 |   | x |   | x                                                         |

|                               |          |   |   |   |   |                                                          |
|-------------------------------|----------|---|---|---|---|----------------------------------------------------------|
| Soft tissue disorder          | 10061366 |   | x | x |   |                                                          |
| Sore oesophagus               | 10041365 | x |   | x |   |                                                          |
| Substance abuse               | 10066169 |   | x |   | x |                                                          |
| Tenderness                    | 10043224 |   | x |   | x |                                                          |
| Tendinitis                    | 10043232 | x |   | x |   | Could be other causes                                    |
| Thrombosis leg                | 10043623 |   | x | x |   | Swollen leg                                              |
| Tibia fracture                | 10043827 | x |   | x |   |                                                          |
| Type 1 diabetes mellitus      | 10067584 |   | x |   | x |                                                          |
| Underdose                     | 10057362 | x |   | x |   |                                                          |
| Unilateral vision loss        | 10059679 |   | x | x |   |                                                          |
| Urinary retention             | 10046555 |   | x |   | x |                                                          |
| Urticaria                     | 10046735 |   | x | x |   |                                                          |
| Uterine prolapse              | 10046814 | x |   | x |   |                                                          |
| Vaccination site inflammation | 10068878 |   | x |   | x |                                                          |
| Venous thrombosis             |          |   |   |   |   | I might know but could confuse it with something else... |
|                               | 10047249 |   | x | x |   |                                                          |
| Visual hallucinations         | 10047570 |   | x |   | x |                                                          |
| Vulvovaginal pain             | 10069055 | x |   | x |   |                                                          |
| Weakness left or right side   | 10047866 |   | x |   | x |                                                          |
| Whitlow                       | 10059856 | x |   | x |   |                                                          |
| Wound healing delayed         | 10048036 |   | x |   | x |                                                          |
| Writing impaired              | 10048053 |   | x |   | X |                                                          |

LLT = Lowest level term

### Overview of evaluated probably understandable terms

| LLT                          | LLT code | Your opinion |       | For other people |       | Suggestions for improvement |
|------------------------------|----------|--------------|-------|------------------|-------|-----------------------------|
|                              |          | Unclear      | Clear | Unclear          | Clear |                             |
| Scoliosis                    | 10039722 | x            |       | x                |       |                             |
| Shingles                     | 10040555 |              | x     |                  | x     |                             |
| Ache                         | 10000424 |              | x     |                  | x     |                             |
| Cold feet                    | 10009859 |              | x     |                  | x     |                             |
| Dizziness                    | 10013573 |              | x     |                  | x     |                             |
| Eye burns                    | 10015911 | x            |       | x                |       |                             |
| Flu                          | 10016790 |              | x     |                  | x     |                             |
| Hand rash                    | 10019117 |              | x     |                  | x     |                             |
| Increased tendency to bruise | 10021688 |              | x     |                  | X     |                             |

LLT = Lowest level term
