# Supplementary material for: Use of a Patient-Friendly Terms List in the Adverse Drug Reaction Report Form: A Database Study
Source: PubMed Central journal article supplement — Drug Saf. 2019 Feb 6;42(7):881–6. doi: 10.1007/s40264-019-00800-x (PMC6581931; doi:10.1007/s40264-019-00800-x), 2019-02-06
Supplement: 40264_2019_800_MOESM2_ESM.pdf [file 40264_2019_800_MOESM2_ESM.pdf]

# *Drug Safety*

## **Use of a patient-friendly terms list in the adverse drug reaction report form: A database study**

*Sieta T. de Vries, PhD<sup>1</sup>; Judy Harrison, MD<sup>2</sup>; Patrick Revelle<sup>2</sup>; Alicia Ptaszynska-Neophytou<sup>3</sup>; Anna Radecka<sup>3</sup>; Gowthamei Ragunathan<sup>3</sup>; Phil Tregunno<sup>3</sup>; Petra Denig, PhD<sup>1</sup>; Peter G.M. Mol, PhD<sup>1,4</sup>*

<sup>1</sup> *University of Groningen, University Medical Center Groningen, Department of Clinical Pharmacy and Pharmacology, Groningen, The Netherlands*

<sup>2</sup> *MedDRA Maintenance and Support Services Organization (MSSO)*

<sup>3</sup> *Medicines and Healthcare products Regulatory Agency (MHRA)*

<sup>4</sup> *Dutch Medicines Evaluation Board, Utrecht, The Netherlands*

✉ [p.g.m.mol@umcg.nl](mailto:p.g.m.mol@umcg.nl)

---

## **Supplemental Digital Content**

This Supplemental Digital Content contains the appendix referred to in the full version of this article, which can be found at <http://adisonline.com/drugsafety>

## Electronic Supplementary Material 2. Screenshot of patient-friendly terms that appear after entering a few letters

← → ↻ <https://yellowcard.mhra.gov.uk/mop-form/suspectreactions/> 🗨️ ☆ ⌵ ⚙️ | 🔴 ⋮

1. Reporter Details 2. Whose Side Effect 3. About the Medicines **4. Side Effects** 5. Additional Details 6. Overview

### 4. Side Effects

**i** Please enter details of the side effects experienced. A description of the side effects can be entered in the free-text box at the bottom of the page and more than one side effect can be entered if needed, simply click 'Add another Side Effect'.

As part of the MHRA's efforts to continually improve side effect reporting forms we are piloting a new 'pick list' of side effects terms that we hope will provide you with the most appropriate term to choose. If you would like to provide feedback please use the 'Contact Us' page on the website.

Fields that you must complete are marked with this symbol: **required**

**Side effect** **required**

leg

- Leg ulcer
- Loss of control of legs
- Nocturnal leg muscle cramps
- Numbness in leg
- Pain in leg
- Pains in legs
- Phlegm
- Rash both legs
- Redness of legs
- Restless legs
- Swelling of legs
- Thrombosis leg

Recovered with some lasting effects

Getting better

Side effect continuing

Caused death

Unknown

Other
