# Supplementary material for: Use of a Patient-Friendly Terms List in the Adverse Drug Reaction Report Form: A Database Study
Source: PubMed Central journal article supplement — Drug Saf. 2019 Feb 6;42(7):881–6. doi: 10.1007/s40264-019-00800-x (PMC6581931; doi:10.1007/s40264-019-00800-x), 2019-02-06
Supplement: 40264_2019_800_MOESM3_ESM.pdf [file 40264_2019_800_MOESM3_ESM.pdf]

# *Drug Safety*

## **Use of a patient-friendly terms list in the adverse drug reaction report form: A database study**

*Sieta T. de Vries, PhD<sup>1</sup>; Judy Harrison, MD<sup>2</sup>; Patrick Revelle<sup>2</sup>; Alicia Ptaszynska-Neophytou<sup>3</sup>; Anna Radecka<sup>3</sup>; Gowthamei Ragunathan<sup>3</sup>; Phil Tregunno<sup>3</sup>; Petra Denig, PhD<sup>1</sup>; Peter G.M. Mol, PhD<sup>1,4</sup>*

<sup>1</sup> *University of Groningen, University Medical Center Groningen, Department of Clinical Pharmacy and Pharmacology, Groningen, The Netherlands*

<sup>2</sup> *MedDRA Maintenance and Support Services Organization (MSSO)*

<sup>3</sup> *Medicines and Healthcare products Regulatory Agency (MHRA)*

<sup>4</sup> *Dutch Medicines Evaluation Board, Utrecht, The Netherlands*

✉ [p.g.m.mol@umcg.nl](mailto:p.g.m.mol@umcg.nl)

---

## **Supplemental Digital Content**

This Supplemental Digital Content contains the appendix referred to in the full version of this article, which can be found at <http://adisonline.com/drugsafety>

### Electronic Supplementary Material 3. Lowest Level Terms in the adverse drug reaction reports

| LLT                              | Total number (%) | Number entered as free text (%) | Number reported using patient-friendly list (%) |
|----------------------------------|------------------|---------------------------------|-------------------------------------------------|
| ABDOMINAL BLOATING               | 5 (2)            | 1 (2)                           | 4 (2)                                           |
| ABDOMINAL COLIC                  | 1 (2)            | 1 (2)                           | 0 (0)                                           |
| ABDOMINAL CRAMPS                 | 4 (2)            | 1 (2)                           | 3 (2)                                           |
| ABDOMINAL DISCOMFORT             | 1 (2)            | 1 (2)                           | 0 (0)                                           |
| ABDOMINAL DISORDER               | 1 (2)            | 1 (2)                           | 0 (0)                                           |
| ABDOMINAL PAIN                   | 16 (2)           | 11 (2)                          | 5 (2)                                           |
| ABNORMAL BEHAVIOUR               | 4 (2)            | 4 (2)                           | 0 (0)                                           |
| ABNORMAL BREATHING               | 1 (2)            | 1 (2)                           | 0 (0)                                           |
| ABNORMAL CHEST SOUNDS            | 1 (2)            | 1 (2)                           | 0 (0)                                           |
| ABNORMAL DREAMS                  | 3 (2)            | 3 (2)                           | 0 (0)                                           |
| ABNORMAL FAECES                  | 1 (2)            | 1 (2)                           | 0 (0)                                           |
| ABNORMAL LIVER FUNCTION TESTS    | 1 (2)            | 1 (2)                           | 0 (0)                                           |
| ABNORMAL LOSS OF WEIGHT          | 3 (2)            | 2 (2)                           | 1 (2)                                           |
| ABNORMAL PHYSICAL SENSATION      | 1 (2)            | 1 (2)                           | 0 (0)                                           |
| ABNORMAL STOOLS                  | 2 (2)            | 2 (2)                           | 0 (0)                                           |
| ABNORMAL THINKING                | 1 (2)            | 1 (2)                           | 0 (0)                                           |
| ABNORMAL WEIGHT GAIN             | 15 (2)           | 10 (2)                          | 5 (2)                                           |
| ACCIDENTAL OVERDOSE              | 1 (2)            | 1 (2)                           | 0 (0)                                           |
| ACCIDENTAL UNDERDOSE             | 1 (2)            | 1 (2)                           | 0 (0)                                           |
| ACHE                             | 6 (2)            | 4 (2)                           | 2 (2)                                           |
| ACHE STOMACH                     | 2 (2)            | 2 (2)                           | 0 (0)                                           |
| ACHES & PAINS IN LEGS            | 1 (2)            | 1 (2)                           | 0 (0)                                           |
| ACHILLES TENDON DISCOMFORT       | 2 (2)            | 2 (2)                           | 0 (0)                                           |
| ACHILLES TENDON PAIN             | 1 (2)            | 0 (0)                           | 1 (2)                                           |
| ACHING IN LIMB                   | 1 (2)            | 0 (0)                           | 1 (2)                                           |
| ACHING JOINTS                    | 1 (2)            | 1 (2)                           | 0 (0)                                           |
| ACID REFLUX (ESOPHAGEAL)         | 1 (2)            | 1 (2)                           | 0 (0)                                           |
| ACID REFLUX (OESOPHAGEAL)        | 4 (2)            | 4 (2)                           | 0 (0)                                           |
| ACNE                             | 4 (2)            | 3 (2)                           | 1 (2)                                           |
| ACUTE KIDNEY INJURY              | 1 (2)            | 1 (2)                           | 0 (0)                                           |
| ACUTE MASSIVE PULMONARY EMBOLISM | 1 (2)            | 1 (2)                           | 0 (0)                                           |
| ADDICTION                        | 1 (2)            | 1 (2)                           | 0 (0)                                           |
| ADDISONIAN CRISIS                | 1 (2)            | 1 (2)                           | 0 (0)                                           |
| ADHESIVE PLASTER SENSITIVITY     | 1 (2)            | 1 (2)                           | 0 (0)                                           |
| AFTER TASTE                      | 2 (2)            | 1 (2)                           | 1 (2)                                           |
| AGGRESSION                       | 3 (2)            | 3 (2)                           | 0 (0)                                           |
| AGGRESSIVENESS                   | 1 (2)            | 1 (2)                           | 0 (0)                                           |
| AGITATED                         | 4 (2)            | 3 (2)                           | 1 (2)                                           |
| AGITATION                        | 7 (2)            | 7 (2)                           | 0 (0)                                           |
| AIR HUNGER                       | 1 (2)            | 1 (2)                           | 0 (0)                                           |

---

|                                       |        |        |       |
|---------------------------------------|--------|--------|-------|
| AKATHISIA                             | 4 (2)  | 4 (2)  | 0 (0) |
| ALANINE AMINOTRANSFERASE<br>INCREASED | 1 (2)  | 1 (2)  | 0 (0) |
| ALCOHOL ABUSE                         | 1 (2)  | 1 (2)  | 0 (0) |
| ALCOHOL CRAVING                       | 1 (2)  | 1 (2)  | 0 (0) |
| ALCOHOL INTOLERANCE                   | 3 (2)  | 3 (2)  | 0 (0) |
| ALCOHOL TOLERANCE LOWERED             | 1 (2)  | 1 (2)  | 0 (0) |
| ALKALINE PHOSPHATASE INCREASED        | 1 (2)  | 1 (2)  | 0 (0) |
| ALLERGIC PURPURA                      | 1 (2)  | 1 (2)  | 0 (0) |
| ALLERGIC RASH                         | 3 (2)  | 1 (2)  | 2 (2) |
| ALLERGIC REACTION                     | 9 (2)  | 7 (2)  | 2 (2) |
| ALLERGIC REACTION TO EXCIPIENT        | 2 (2)  | 2 (2)  | 0 (0) |
| ALLERGIC RHINITIS                     | 2 (2)  | 1 (2)  | 1 (2) |
| ALOPECIA                              | 1 (2)  | 1 (2)  | 0 (0) |
| ALTERED HORMONE LEVEL                 | 1 (2)  | 1 (2)  | 0 (0) |
| ALTERED SALIVA                        | 1 (2)  | 1 (2)  | 0 (0) |
| AMENORRHEA                            | 1 (2)  | 1 (2)  | 0 (0) |
| AMNESIA                               | 1 (2)  | 1 (2)  | 0 (0) |
| ANAL BLEEDING                         | 2 (2)  | 0 (0)  | 2 (2) |
| ANAL DISCOMFORT                       | 1 (2)  | 1 (2)  | 0 (0) |
| ANAL FISSURE                          | 1 (2)  | 1 (2)  | 0 (0) |
| ANAL INFLAMMATION                     | 2 (2)  | 2 (2)  | 0 (0) |
| ANAL PAIN                             | 1 (2)  | 0 (0)  | 1 (2) |
| ANAL PRURITUS                         | 1 (2)  | 1 (2)  | 0 (0) |
| ANAPHYLACTIC REACTION                 | 1 (2)  | 0 (0)  | 1 (2) |
| ANGER                                 | 5 (2)  | 4 (2)  | 1 (2) |
| ANGINA ATTACK                         | 1 (2)  | 0 (0)  | 1 (2) |
| ANGINA PECTORIS                       | 1 (2)  | 1 (2)  | 0 (0) |
| ANHEDONIA                             | 3 (2)  | 3 (2)  | 0 (0) |
| ANKLE OEDEMA                          | 1 (2)  | 1 (2)  | 0 (0) |
| ANKLE SWELLING                        | 2 (2)  | 2 (2)  | 0 (0) |
| ANORGASMIA                            | 2 (2)  | 2 (2)  | 0 (0) |
| ANOSMIA                               | 1 (2)  | 1 (2)  | 0 (0) |
| ANXIETY                               | 29 (2) | 21 (2) | 8 (2) |
| ANXIETY AGGRAVATED                    | 3 (2)  | 3 (2)  | 0 (0) |
| ANXIETY ATTACK                        | 1 (2)  | 0 (0)  | 1 (2) |
| ANXIETY DEPRESSION                    | 1 (2)  | 1 (2)  | 0 (0) |
| ANXIOUS MOOD                          | 2 (2)  | 0 (0)  | 2 (2) |
| APPETITE LOST                         | 26 (2) | 21 (2) | 5 (2) |
| APPLICATION SITE BLEEDING             | 1 (2)  | 1 (2)  | 0 (0) |
| APPLICATION SITE BLISTER              | 1 (2)  | 1 (2)  | 0 (0) |
| APPLICATION SITE BURN                 | 2 (2)  | 2 (2)  | 0 (0) |
| APPLICATION SITE BURNING              | 1 (2)  | 1 (2)  | 0 (0) |
| APPLICATION SITE DISCHARGE            | 1 (2)  | 1 (2)  | 0 (0) |
| APPLICATION SITE IRRITATION           | 1 (2)  | 1 (2)  | 0 (0) |
| APPLICATION SITE ITCHING              | 1 (2)  | 0 (0)  | 1 (2) |

---

---

|                                       |       |       |       |
|---------------------------------------|-------|-------|-------|
| APPLICATION SITE PAIN                 | 2 (2) | 2 (2) | 0 (0) |
| APPLICATION SITE PEELING              | 1 (2) | 1 (2) | 0 (0) |
| APPLICATION SITE REDNESS              | 1 (2) | 1 (2) | 0 (0) |
| ARGUMENTATIVENESS                     | 1 (2) | 1 (2) | 0 (0) |
| ARM DISCOMFORT                        | 1 (2) | 1 (2) | 0 (0) |
| ARRHYTHMIA                            | 1 (2) | 1 (2) | 0 (0) |
| ARTHRALGIA                            | 3 (2) | 3 (2) | 0 (0) |
| ARTHRITIC-LIKE PAIN                   | 1 (2) | 1 (2) | 0 (0) |
| ARTHRITIS                             | 1 (2) | 1 (2) | 0 (0) |
| ASTHMA AGGRAVATED                     | 3 (2) | 2 (2) | 1 (2) |
| ASTHMATIC ATTACK                      | 1 (2) | 0 (0) | 1 (2) |
| ATRIAL FIBRILLATION                   | 2 (2) | 2 (2) | 0 (0) |
| AUDITORY AND VISUAL<br>HALLUCINATIONS | 1 (2) | 1 (2) | 0 (0) |
| AUDITORY HALLUCINATIONS               | 1 (2) | 1 (2) | 0 (0) |
| AURA                                  | 1 (2) | 1 (2) | 0 (0) |
| AVOIDANT PERSONALITY                  | 1 (2) | 1 (2) | 0 (0) |
| BACK ACHE                             | 4 (2) | 4 (2) | 0 (0) |
| BACK ARCHED BACKWARD                  | 1 (2) | 1 (2) | 0 (0) |
| BACK MUSCLE SPASMS                    | 1 (2) | 1 (2) | 0 (0) |
| BACK PAIN                             | 9 (2) | 9 (2) | 0 (0) |
| BACK PAIN (WITH RADIATION)            | 1 (2) | 1 (2) | 0 (0) |
| BACKACHE                              | 2 (2) | 2 (2) | 0 (0) |
| BACTERIAL INFECTION                   | 1 (2) | 0 (0) | 1 (2) |
| BACTERIAL VAGINOSIS                   | 1 (2) | 1 (2) | 0 (0) |
| BAD BREATH                            | 1 (2) | 0 (0) | 1 (2) |
| BAD DREAMS                            | 1 (2) | 0 (0) | 1 (2) |
| BAD MOOD                              | 1 (2) | 0 (0) | 1 (2) |
| BALANCE DISORDER                      | 2 (2) | 2 (2) | 0 (0) |
| BALANITIS                             | 1 (2) | 1 (2) | 0 (0) |
| BEHAVIOR DISORDER                     | 1 (2) | 1 (2) | 0 (0) |
| BEHAVIOUR ABNORMAL                    | 1 (2) | 1 (2) | 0 (0) |
| BELCHING                              | 1 (2) | 0 (0) | 1 (2) |
| BILE DUCT STRICTURE                   | 1 (2) | 1 (2) | 0 (0) |
| BILIOUS VOMITING                      | 1 (2) | 1 (2) | 0 (0) |
| BINGE EATING                          | 1 (2) | 1 (2) | 0 (0) |
| BIPOLAR DISORDER                      | 1 (2) | 1 (2) | 0 (0) |
| BLACK STOOLS                          | 1 (2) | 1 (2) | 0 (0) |
| BLACKED OUT                           | 2 (2) | 2 (2) | 0 (0) |
| BLACKOUT                              | 3 (2) | 3 (2) | 0 (0) |
| BLADDER DILATATION                    | 1 (2) | 1 (2) | 0 (0) |
| BLADDER INFECTION                     | 2 (2) | 2 (2) | 0 (0) |
| BLADDER PAIN                          | 1 (2) | 0 (0) | 1 (2) |
| BLEEDING                              | 6 (2) | 6 (2) | 0 (0) |
| BLEEDING MENSTRUAL HEAVY              | 1 (2) | 0 (0) | 1 (2) |
| BLEEDING NOSE                         | 1 (2) | 1 (2) | 0 (0) |

---

---

|                                            |        |       |       |
|--------------------------------------------|--------|-------|-------|
| BLEEDING TIME PROLONGED                    | 1 (2)  | 1 (2) | 0 (0) |
| BLEPHAROSPASM                              | 1 (2)  | 1 (2) | 0 (0) |
| BLINDNESS TEMPORARY                        | 1 (2)  | 1 (2) | 0 (0) |
| BLISTER                                    | 1 (2)  | 1 (2) | 0 (0) |
| BLISTERING                                 | 3 (2)  | 3 (2) | 0 (0) |
| BLISTERING OF MOUTH                        | 1 (2)  | 0 (0) | 1 (2) |
| BLISTERS                                   | 3 (2)  | 3 (2) | 0 (0) |
| BLISTERY RASH                              | 2 (2)  | 2 (2) | 0 (0) |
| BLOATED FEELING                            | 2 (2)  | 2 (2) | 0 (0) |
| BLOATING                                   | 9 (2)  | 9 (2) | 0 (0) |
| BLOOD CHOLESTEROL INCREASED                | 1 (2)  | 1 (2) | 0 (0) |
| BLOOD DISORDER                             | 1 (2)  | 1 (2) | 0 (0) |
| BLOOD IN STOOL                             | 1 (2)  | 1 (2) | 0 (0) |
| BLOOD IN URINE                             | 4 (2)  | 3 (2) | 1 (2) |
| BLOOD PRESSURE DECREASED                   | 1 (2)  | 1 (2) | 0 (0) |
| BLOOD PRESSURE HIGH                        | 2 (2)  | 1 (2) | 1 (2) |
| BLOOD PRESSURE INCREASED                   | 5 (2)  | 5 (2) | 0 (0) |
| BLOOD PRESSURE LOW                         | 2 (2)  | 2 (2) | 0 (0) |
| BLOOD PRESSURE SYSTOLIC LOW                | 1 (2)  | 1 (2) | 0 (0) |
| BLOOD SUGAR DECREASED                      | 2 (2)  | 2 (2) | 0 (0) |
| BLOOD TEST ABNORMAL                        | 1 (2)  | 1 (2) | 0 (0) |
| BLOOD THYROID STIMULATING<br>HORMONE INC.. | 1 (2)  | 1 (2) | 0 (0) |
| BLOODSHOT EYE                              | 3 (2)  | 2 (2) | 1 (2) |
| BLOODY DIARRHOEA                           | 1 (2)  | 0 (0) | 1 (2) |
| BLOODY DISCHARGE                           | 1 (2)  | 1 (2) | 0 (0) |
| BLOODY STOOL                               | 1 (2)  | 1 (2) | 0 (0) |
| BLOTCHY                                    | 1 (2)  | 1 (2) | 0 (0) |
| BLOTCHY RASH                               | 2 (2)  | 2 (2) | 0 (0) |
| BLURRED VISION                             | 12 (2) | 7 (2) | 5 (2) |
| BODY ODOUR                                 | 1 (2)  | 0 (0) | 1 (2) |
| BODY TEMPERATURE DECREASED                 | 1 (2)  | 1 (2) | 0 (0) |
| BODY TEMPERATURE INCREASED                 | 4 (2)  | 4 (2) | 0 (0) |
| BOIL                                       | 2 (2)  | 1 (2) | 1 (2) |
| BONE PAIN                                  | 3 (2)  | 2 (2) | 1 (2) |
| BOWEL INCONTINENCE                         | 2 (2)  | 2 (2) | 0 (0) |
| BOWEL OBSTRUCTION                          | 1 (2)  | 1 (2) | 0 (0) |
| BRAIN DAMAGE                               | 1 (2)  | 1 (2) | 0 (0) |
| BRAIN SWELLING                             | 1 (2)  | 1 (2) | 0 (0) |
| BREAST DISCHARGE                           | 2 (2)  | 0 (0) | 2 (2) |
| BREAST ENLARGEMENT FEMALE                  | 1 (2)  | 1 (2) | 0 (0) |
| BREAST ENLARGEMENT MALE                    | 2 (2)  | 0 (0) | 2 (2) |
| BREAST LUMP (BENIGN)                       | 1 (2)  | 1 (2) | 0 (0) |
| BREATHING ARRESTED                         | 1 (2)  | 1 (2) | 0 (0) |
| BREATHING DIFFICULT                        | 1 (2)  | 1 (2) | 0 (0) |
| BREATHING SHALLOW                          | 1 (2)  | 1 (2) | 0 (0) |

---

---

|                             |        |        |       |
|-----------------------------|--------|--------|-------|
| BREATHLESSNESS              | 10 (2) | 10 (2) | 0 (0) |
| BRITTLE NAILS               | 2 (2)  | 1 (2)  | 1 (2) |
| BROKEN NAILS                | 2 (2)  | 2 (2)  | 0 (0) |
| BRONCHIECTASIS              | 1 (2)  | 1 (2)  | 0 (0) |
| BROWN URINE                 | 1 (2)  | 0 (0)  | 1 (2) |
| BRUISE                      | 1 (2)  | 1 (2)  | 0 (0) |
| BRUISING                    | 2 (2)  | 1 (2)  | 1 (2) |
| BRUISING OF FACE            | 1 (2)  | 0 (0)  | 1 (2) |
| BRUXISM                     | 1 (2)  | 1 (2)  | 0 (0) |
| BURNING IN THROAT           | 6 (2)  | 5 (2)  | 1 (2) |
| BURNING MOUTH               | 2 (2)  | 2 (2)  | 0 (0) |
| BURNING ORAL SENSATION      | 1 (2)  | 1 (2)  | 0 (0) |
| BURNING SENSATION           | 17 (2) | 17 (2) | 0 (0) |
| BURNING SENSATION IN EYE    | 1 (2)  | 1 (2)  | 0 (0) |
| BURNING SENSATION SKIN      | 1 (2)  | 1 (2)  | 0 (0) |
| BURNING SKIN                | 3 (2)  | 3 (2)  | 0 (0) |
| BURNING TONGUE              | 4 (2)  | 3 (2)  | 1 (2) |
| BURPING                     | 1 (2)  | 0 (0)  | 1 (2) |
| BURSITIS OF KNEE            | 1 (2)  | 1 (2)  | 0 (0) |
| BUTTOCK PAIN                | 1 (2)  | 0 (0)  | 1 (2) |
| CALCIUM DEPOSITS            | 1 (2)  | 1 (2)  | 0 (0) |
| CALF DISCOMFORT             | 1 (2)  | 1 (2)  | 0 (0) |
| CALF PAIN                   | 1 (2)  | 1 (2)  | 0 (0) |
| CANKER SORES ORAL           | 1 (2)  | 1 (2)  | 0 (0) |
| CARDIAC ARREST              | 1 (2)  | 1 (2)  | 0 (0) |
| CARDIAC ARRHYTHMIA          | 2 (2)  | 2 (2)  | 0 (0) |
| CARDIAC PAIN                | 1 (2)  | 1 (2)  | 0 (0) |
| CARPAL TUNNEL SYNDROME      | 1 (2)  | 1 (2)  | 0 (0) |
| CATARRH                     | 1 (2)  | 1 (2)  | 0 (0) |
| CENTRAL PAIN SYNDROME       | 1 (2)  | 1 (2)  | 0 (0) |
| CEREBROVASCULAR ACCIDENT    | 1 (2)  | 1 (2)  | 0 (0) |
| CHANGE IN BOWEL HABITS      | 1 (2)  | 0 (0)  | 1 (2) |
| CHEST BURNING PAIN OF       | 1 (2)  | 1 (2)  | 0 (0) |
| CHEST DISCOMFORT            | 2 (2)  | 2 (2)  | 0 (0) |
| CHEST HOT FEELING OF        | 1 (2)  | 1 (2)  | 0 (0) |
| CHEST INFECTION             | 2 (2)  | 2 (2)  | 0 (0) |
| CHEST PAIN                  | 23 (2) | 18 (2) | 5 (2) |
| CHEST PAIN - CARDIAC        | 1 (2)  | 1 (2)  | 0 (0) |
| CHEST PRESSURE              | 1 (2)  | 1 (2)  | 0 (0) |
| CHEST PRESSURE SENSATION OF | 1 (2)  | 1 (2)  | 0 (0) |
| CHEST TIGHTNESS             | 5 (2)  | 2 (2)  | 3 (2) |
| CHILLS                      | 4 (2)  | 3 (2)  | 1 (2) |
| CHOKING SENSATION           | 1 (2)  | 1 (2)  | 0 (0) |
| CHOLESTEROL HIGH            | 1 (2)  | 1 (2)  | 0 (0) |
| CHRONIC FATIGUE             | 5 (2)  | 0 (0)  | 5 (2) |
| CHRONIC FATIGUE SYNDROME    | 1 (2)  | 1 (2)  | 0 (0) |

---

---

|                                      |        |        |        |
|--------------------------------------|--------|--------|--------|
| CHRONIC HEARTBURN                    | 2 (2)  | 2 (2)  | 0 (0)  |
| CHRONIC WHEEZING                     | 1 (2)  | 1 (2)  | 0 (0)  |
| CLAMMINESS                           | 1 (2)  | 1 (2)  | 0 (0)  |
| CLAMMY                               | 2 (2)  | 1 (2)  | 1 (2)  |
| CLAUSTROPHOBIA                       | 1 (2)  | 1 (2)  | 0 (0)  |
| CLOT BLOOD                           | 1 (2)  | 1 (2)  | 0 (0)  |
| CLOUDY URINE                         | 1 (2)  | 1 (2)  | 0 (0)  |
| CLOUDY VISION                        | 1 (2)  | 0 (0)  | 1 (2)  |
| CLUMSINESS                           | 2 (2)  | 2 (2)  | 0 (0)  |
| CLUSTER HEADACHES                    | 1 (2)  | 1 (2)  | 0 (0)  |
| COFFEE GROUND VOMITING               | 1 (2)  | 1 (2)  | 0 (0)  |
| COGNITIVE DETERIORATION              | 1 (2)  | 1 (2)  | 0 (0)  |
| COGNITIVE DISORDER                   | 1 (2)  | 1 (2)  | 0 (0)  |
| COGNITIVE IMPAIRMENT                 | 3 (2)  | 2 (2)  | 1 (2)  |
| COLD                                 | 4 (2)  | 4 (2)  | 0 (0)  |
| COLD SWEAT                           | 1 (2)  | 0 (0)  | 1 (2)  |
| COLD SYMPTOMS                        | 1 (2)  | 1 (2)  | 0 (0)  |
| COLDNESS                             | 1 (2)  | 1 (2)  | 0 (0)  |
| CONCENTRATION ABILITY IMPAIRED       | 1 (2)  | 1 (2)  | 0 (0)  |
| CONCENTRATION IMPAIRED               | 4 (2)  | 4 (2)  | 0 (0)  |
| CONCENTRATION LOSS                   | 8 (2)  | 4 (2)  | 4 (2)  |
| CONDITION AGGRAVATED                 | 17 (2) | 17 (2) | 0 (0)  |
| CONFUSION                            | 14 (2) | 10 (2) | 4 (2)  |
| CONJUNCTIVAL CONCRETION              | 1 (2)  | 1 (2)  | 0 (0)  |
| CONSTIPATION                         | 21 (2) | 11 (2) | 10 (2) |
| CONSTIPATION CHRONIC                 | 1 (2)  | 1 (2)  | 0 (0)  |
| CONTRACTION SKELETAL MUSCLE          | 1 (2)  | 1 (2)  | 0 (0)  |
| CONTRAINDICATED DRUG<br>ADMINISTERED | 1 (2)  | 1 (2)  | 0 (0)  |
| CONTRAINDICATED DRUG<br>PRESCRIBED   | 2 (2)  | 2 (2)  | 0 (0)  |
| CONVULSION                           | 1 (2)  | 0 (0)  | 1 (2)  |
| COUGH                                | 6 (2)  | 5 (2)  | 1 (2)  |
| COUGH AGGRAVATED                     | 1 (2)  | 1 (2)  | 0 (0)  |
| COUGHING                             | 6 (2)  | 4 (2)  | 2 (2)  |
| CRAMP OF LIMB                        | 1 (2)  | 0 (0)  | 1 (2)  |
| CRAMPS                               | 3 (2)  | 3 (2)  | 0 (0)  |
| CRAMPS IN LEGS                       | 1 (2)  | 1 (2)  | 0 (0)  |
| CRAWLING SENSATION OF SKIN           | 2 (2)  | 2 (2)  | 0 (0)  |
| CRYING                               | 2 (2)  | 2 (2)  | 0 (0)  |
| CRYING ABNORMAL                      | 2 (2)  | 2 (2)  | 0 (0)  |
| CYST                                 | 1 (2)  | 1 (2)  | 0 (0)  |
| CYSTIC ACNE                          | 1 (2)  | 1 (2)  | 0 (0)  |
| CYSTIC ADENOMATOID<br>MALFORMATION   | 1 (2)  | 1 (2)  | 0 (0)  |
| CYSTITIS-LIKE SYMPTOM                | 1 (2)  | 1 (2)  | 0 (0)  |
| DARK CIRCLES UNDER EYES              | 1 (2)  | 1 (2)  | 0 (0)  |

---

---

|                           |        |        |        |
|---------------------------|--------|--------|--------|
| DAYTIME SLEEPINESS        | 5 (2)  | 2 (2)  | 3 (2)  |
| DEAFNESS                  | 1 (2)  | 1 (2)  | 0 (0)  |
| DECREASED APPETITE        | 1 (2)  | 1 (2)  | 0 (0)  |
| DECREASED MUSCLE TONE     | 1 (2)  | 1 (2)  | 0 (0)  |
| DEEP VEIN THROMBOSIS      | 1 (2)  | 1 (2)  | 0 (0)  |
| DEFECATION DESIRE         | 1 (2)  | 1 (2)  | 0 (0)  |
| DEHYDRATION               | 4 (2)  | 2 (2)  | 2 (2)  |
| DELAYED PERIOD            | 2 (2)  | 2 (2)  | 0 (0)  |
| DELIBERATE SELF-HARM      | 2 (2)  | 1 (2)  | 1 (2)  |
| DELUSION                  | 2 (2)  | 2 (2)  | 0 (0)  |
| DELUSIONS                 | 1 (2)  | 1 (2)  | 0 (0)  |
| DENTAL CAVITY             | 1 (2)  | 1 (2)  | 0 (0)  |
| DEPRESSED MOOD            | 1 (2)  | 1 (2)  | 0 (0)  |
| DEPRESSION                | 28 (2) | 28 (2) | 0 (0)  |
| DEPRESSION AGGRAVATED     | 3 (2)  | 3 (2)  | 0 (0)  |
| DEPRESSIVE STATE          | 1 (2)  | 1 (2)  | 0 (0)  |
| DETACHED RETINA           | 1 (2)  | 0 (0)  | 1 (2)  |
| DETACHMENT EMOTIONAL      | 1 (2)  | 1 (2)  | 0 (0)  |
| DIABETIC KETOACIDOSIS     | 1 (2)  | 1 (2)  | 0 (0)  |
| DIARRHOEA + Diarrhea      | 62 (2) | 0 (0)  | 0 (0)  |
| DIARRHOEA AGGRAVATED      | 2 (2)  | 2 (2)  | 0 (0)  |
| DIFFICULTY BREATHING      | 20 (2) | 17 (2) | 3 (2)  |
| DIFFICULTY FOCUSING EYES  | 6 (2)  | 3 (2)  | 3 (2)  |
| DIFFICULTY SLEEPING       | 12 (2) | 6 (2)  | 6 (2)  |
| DIFFICULTY THINKING       | 1 (2)  | 1 (2)  | 0 (0)  |
| DIGESTION IMPAIRED        | 1 (2)  | 1 (2)  | 0 (0)  |
| DILATATION OF STOMACH     | 1 (2)  | 1 (2)  | 0 (0)  |
| DILATED PUPILS            | 1 (2)  | 1 (2)  | 0 (0)  |
| DIMINISHED SENSE OF SMELL | 1 (2)  | 1 (2)  | 0 (0)  |
| DISCOLORATION URINE       | 2 (2)  | 2 (2)  | 0 (0)  |
| DISCOLOURED STOOLS        | 1 (2)  | 1 (2)  | 0 (0)  |
| DISCOMFORT                | 3 (2)  | 2 (2)  | 1 (2)  |
| DISCOMFORT IN JOINTS      | 1 (2)  | 1 (2)  | 0 (0)  |
| DISORIENTATED             | 2 (2)  | 1 (2)  | 1 (2)  |
| DISORIENTATION            | 3 (2)  | 3 (2)  | 0 (0)  |
| DISTENDED ABDOMEN         | 1 (2)  | 1 (2)  | 0 (0)  |
| DISTURBANCE IN ATTENTION  | 1 (2)  | 1 (2)  | 0 (0)  |
| DIVERTICULITIS            | 1 (2)  | 1 (2)  | 0 (0)  |
| DIZZINESS                 | 54 (2) | 36 (2) | 18 (2) |
| DIZZINESS AGGRAVATED      | 1 (2)  | 1 (2)  | 0 (0)  |
| DIZZINESS ON STANDING UP  | 2 (2)  | 0 (0)  | 2 (2)  |
| DIZZY                     | 7 (2)  | 6 (2)  | 1 (2)  |
| DIZZY SPELLS              | 4 (2)  | 0 (0)  | 4 (2)  |
| DOUBLE VISION             | 1 (2)  | 0 (0)  | 1 (2)  |
| DREAM DELIRIUM            | 1 (2)  | 1 (2)  | 0 (0)  |
| DROWSINESS                | 11 (2) | 8 (2)  | 3 (2)  |

---



---

|                                         |        |        |       |
|-----------------------------------------|--------|--------|-------|
| DRUG ADMINISTRATION DURATION            |        |        |       |
| TOO LONG                                | 1 (2)  | 1 (2)  | 0 (0) |
| DRUG ADMINISTRATION ERROR               | 1 (2)  | 1 (2)  | 0 (0) |
| DRUG ALLERGY                            | 1 (2)  | 1 (2)  | 0 (0) |
| DRUG DOSE PRESCRIBING ERROR             | 1 (2)  | 1 (2)  | 0 (0) |
| DRUG EFFECT DELAYED                     | 1 (2)  | 1 (2)  | 0 (0) |
| DRUG INEFFECTIVE                        | 18 (2) | 18 (2) | 0 (0) |
| DRUG INTERACTION                        | 5 (2)  | 5 (2)  | 0 (0) |
| DRUG INTOLERANCE                        | 1 (2)  | 1 (2)  | 0 (0) |
| DRUG MONITORING PROCEDURE NOT PERFORMED | 1 (2)  | 1 (2)  | 0 (0) |
| DRUG OVERDOSE                           | 1 (2)  | 1 (2)  | 0 (0) |
| DRUG SCHEDULE PRESCRIBING ERROR         | 1 (2)  | 1 (2)  | 0 (0) |
| DRUG WITHDRAWAL SYNDROME                | 4 (2)  | 4 (2)  | 0 (0) |
| DRY COUGH                               | 1 (2)  | 0 (0)  | 1 (2) |
| DRY EYES                                | 5 (2)  | 2 (2)  | 3 (2) |
| DRY HAIR                                | 1 (2)  | 1 (2)  | 0 (0) |
| DRY HEAVES                              | 1 (2)  | 0 (0)  | 1 (2) |
| DRY LIPS                                | 1 (2)  | 1 (2)  | 0 (0) |
| DRY MOUTH                               | 18 (2) | 11 (2) | 7 (2) |
| DRY NOSE                                | 1 (2)  | 1 (2)  | 0 (0) |
| DRY SKIN                                | 8 (2)  | 8 (2)  | 0 (0) |
| DRY THROAT                              | 5 (2)  | 5 (2)  | 0 (0) |
| DYSGEUSIA                               | 5 (2)  | 5 (2)  | 0 (0) |
| DYSPEPSIA                               | 1 (2)  | 1 (2)  | 0 (0) |
| DYSPNOEA                                | 1 (2)  | 1 (2)  | 0 (0) |
| DYSPNOEA EXERTIONAL                     | 1 (2)  | 1 (2)  | 0 (0) |
| EAR INFECTION                           | 1 (2)  | 1 (2)  | 0 (0) |
| EAR POPPING SENSATION                   | 1 (2)  | 1 (2)  | 0 (0) |
| EAR RINGING                             | 1 (2)  | 1 (2)  | 0 (0) |
| ECTOPIC PREGNANCY                       | 1 (2)  | 1 (2)  | 0 (0) |
| ECZEMA                                  | 2 (2)  | 2 (2)  | 0 (0) |
| ECZEMA AGGRAVATED                       | 1 (2)  | 1 (2)  | 0 (0) |
| ELECTRIC SHOCK SENSATION                | 5 (2)  | 3 (2)  | 2 (2) |
| EMOTIONAL DISORDER                      | 2 (2)  | 2 (2)  | 0 (0) |
| EMOTIONAL DISTRESS                      | 1 (2)  | 1 (2)  | 0 (0) |
| ENCEPHALOPATHY                          | 1 (2)  | 1 (2)  | 0 (0) |
| ERECTILE DYSFUNCTION                    | 5 (2)  | 1 (2)  | 4 (2) |
| ERYTHEMA                                | 4 (2)  | 4 (2)  | 0 (0) |
| ERYTHEMATOUS RASH                       | 6 (2)  | 6 (2)  | 0 (0) |
| ERYTHROPAPULAR RASH                     | 1 (2)  | 1 (2)  | 0 (0) |
| ESOPHAGEAL REFLUX                       | 1 (2)  | 1 (2)  | 0 (0) |
| EUPHORIC MOOD                           | 1 (2)  | 0 (0)  | 1 (2) |
| EXACERBATION OF ASTHMA                  | 1 (2)  | 1 (2)  | 0 (0) |
| EXCESS SWEATING                         | 7 (2)  | 2 (2)  | 5 (2) |
| EXCESSIVE DAYTIME SLEEPINESS            | 1 (2)  | 1 (2)  | 0 (0) |

---

---

|                                 |        |        |       |
|---------------------------------|--------|--------|-------|
| EXCESSIVE FLATULENCE            | 1 (2)  | 1 (2)  | 0 (0) |
| EXCESSIVE MENSTRUATION          | 1 (2)  | 1 (2)  | 0 (0) |
| EXERTIONAL DYSPNOEA             | 1 (2)  | 1 (2)  | 0 (0) |
| EXHAUSTION                      | 11 (2) | 10 (2) | 1 (2) |
| EXTERNAL GENITALIA              |        |        |       |
| INFLAMMATION                    | 1 (2)  | 1 (2)  | 0 (0) |
| EYE INFLAMED                    | 1 (2)  | 1 (2)  | 0 (0) |
| EYE INFLAMMATION                | 1 (2)  | 1 (2)  | 0 (0) |
| EYE PAIN                        | 4 (2)  | 4 (2)  | 0 (0) |
| EYE PAINFUL RED                 | 1 (2)  | 1 (2)  | 0 (0) |
| EYE RED                         | 1 (2)  | 1 (2)  | 0 (0) |
| EYE SWELLING                    | 1 (2)  | 1 (2)  | 0 (0) |
| EYES HEAVY FEELING OF           | 1 (2)  | 1 (2)  | 0 (0) |
| EYES RED                        | 1 (2)  | 1 (2)  | 0 (0) |
| EYES ROLLING                    | 2 (2)  | 0 (0)  | 2 (2) |
| EYES SWOLLEN                    | 1 (2)  | 1 (2)  | 0 (0) |
| FACIAL PAIN                     | 1 (2)  | 1 (2)  | 0 (0) |
| FACIAL SPASM                    | 2 (2)  | 2 (2)  | 0 (0) |
| FACIAL SWELLING                 | 5 (2)  | 3 (2)  | 2 (2) |
| FAINTING                        | 5 (2)  | 2 (2)  | 3 (2) |
| FALL                            | 1 (2)  | 1 (2)  | 0 (0) |
| FALLOPIAN TUBE DISORDER         | 1 (2)  | 1 (2)  | 0 (0) |
| FATIGUE                         | 28 (2) | 23 (2) | 5 (2) |
| FATIGUE EXTREME                 | 2 (2)  | 2 (2)  | 0 (0) |
| FATTY LIVER                     | 1 (2)  | 1 (2)  | 0 (0) |
| FEAR                            | 1 (2)  | 1 (2)  | 0 (0) |
| FEELING ABNORMAL                | 5 (2)  | 5 (2)  | 0 (0) |
| FEELING ANXIOUS                 | 4 (2)  | 1 (2)  | 3 (2) |
| FEELING COLD                    | 2 (2)  | 2 (2)  | 0 (0) |
| FEELING DETACHED                | 4 (2)  | 3 (2)  | 1 (2) |
| FEELING DOWN                    | 1 (2)  | 1 (2)  | 0 (0) |
| FEELING DRUNK                   | 1 (2)  | 1 (2)  | 0 (0) |
| FEELING HOT                     | 7 (2)  | 6 (2)  | 1 (2) |
| FEELING HOT AND COLD            | 4 (2)  | 3 (2)  | 1 (2) |
| FEELING JITTERY                 | 1 (2)  | 1 (2)  | 0 (0) |
| FEELING OF FULLNESS IN ABDOMEN  | 1 (2)  | 1 (2)  | 0 (0) |
| FEELING OF RESIDUAL URINE       | 1 (2)  | 1 (2)  | 0 (0) |
| FEELING OF TOTAL LACK OF ENERGY | 3 (2)  | 2 (2)  | 1 (2) |
| FEELING SICK                    | 12 (2) | 8 (2)  | 4 (2) |
| FEELING UNWELL                  | 13 (2) | 11 (2) | 2 (2) |
| FEELINGS OF WEAKNESS            | 2 (2)  | 2 (2)  | 0 (0) |
| FELT FAINT                      | 4 (2)  | 4 (2)  | 0 (0) |
| FELT LIKE A ZOMBIE              | 2 (2)  | 2 (2)  | 0 (0) |
| FEMUR FRACTURE                  | 1 (2)  | 1 (2)  | 0 (0) |
| FERRITIN INCREASED              | 1 (2)  | 1 (2)  | 0 (0) |
| FEVER                           | 18 (2) | 14 (2) | 4 (2) |

---

---

|                               |        |       |       |
|-------------------------------|--------|-------|-------|
| FEVER CHILLS                  | 3 (2)  | 0 (0) | 3 (2) |
| FINGER DEFORMITY              | 1 (2)  | 1 (2) | 0 (0) |
| FIT (IN KNOWN EPILEPTIC)      | 1 (2)  | 1 (2) | 0 (0) |
| FLAKING SKIN                  | 2 (2)  | 2 (2) | 0 (0) |
| FLASHING VISION               | 2 (2)  | 2 (2) | 0 (0) |
| FLATULENCE                    | 4 (2)  | 2 (2) | 2 (2) |
| FLOATERS IN EYE               | 1 (2)  | 1 (2) | 0 (0) |
| FLOPPY INFANT                 | 2 (2)  | 2 (2) | 0 (0) |
| FLU LIKE SYMPTOMS             | 6 (2)  | 5 (2) | 1 (2) |
| FLU SYMPTOMS                  | 2 (2)  | 2 (2) | 0 (0) |
| FLU-LIKE SYMPTOMS             | 3 (2)  | 3 (2) | 0 (0) |
| FLUSHING                      | 2 (2)  | 2 (2) | 0 (0) |
| FOGGY FEELING IN HEAD         | 11 (2) | 8 (2) | 3 (2) |
| FOLIC ACID DECREASED          | 1 (2)  | 1 (2) | 0 (0) |
| FONTANELLE BULGING            | 1 (2)  | 1 (2) | 0 (0) |
| FOOD ALLERGY                  | 1 (2)  | 1 (2) | 0 (0) |
| FOOD INTOLERANCE              | 2 (2)  | 2 (2) | 0 (0) |
| FOOT PAIN                     | 2 (2)  | 2 (2) | 0 (0) |
| FOREHEAD HEADACHE             | 1 (2)  | 1 (2) | 0 (0) |
| FOREIGN BODY IN NOSE          | 1 (2)  | 1 (2) | 0 (0) |
| FORGETFULNESS                 | 2 (2)  | 1 (2) | 1 (2) |
| FRACTURED COMPRESSION T8      | 1 (2)  | 1 (2) | 0 (0) |
| FREQUENT BOWEL MOVEMENTS      | 2 (2)  | 1 (2) | 1 (2) |
| FREQUENT HEADACHES            | 11 (2) | 2 (2) | 9 (2) |
| FUNGAL INFECTION              | 3 (2)  | 1 (2) | 2 (2) |
| FUZZY                         | 1 (2)  | 1 (2) | 0 (0) |
| FUZZY HEAD                    | 7 (2)  | 4 (2) | 3 (2) |
| GALLBLADDER DISORDER          | 1 (2)  | 1 (2) | 0 (0) |
| GAS IN STOMACH                | 1 (2)  | 1 (2) | 0 (0) |
| GAS INCONTINENCE              | 1 (2)  | 1 (2) | 0 (0) |
| GASTRIC ACID DECREASED        | 1 (2)  | 1 (2) | 0 (0) |
| GASTROINTESTINAL DISCOMFORT   | 3 (2)  | 1 (2) | 2 (2) |
| GASTROINTESTINAL INFLAMMATION | 1 (2)  | 0 (0) | 1 (2) |
| GASTROINTESTINAL PAIN         | 2 (2)  | 2 (2) | 0 (0) |
| GASTROPARESIS                 | 1 (2)  | 1 (2) | 0 (0) |
| GENERAL BODY PAIN             | 1 (2)  | 1 (2) | 0 (0) |
| GENERALISED ACHING            | 1 (2)  | 1 (2) | 0 (0) |
| GENERALISED ERYTHEMA          | 1 (2)  | 1 (2) | 0 (0) |
| GENERALISED ITCHING           | 5 (2)  | 5 (2) | 0 (0) |
| GENERALISED RASH              | 1 (2)  | 1 (2) | 0 (0) |
| GENERALISED URTICARIA         | 1 (2)  | 0 (0) | 1 (2) |
| GENERALIZED URTICARIAL RASH   | 1 (2)  | 1 (2) | 0 (0) |
| GENERALLY UNWELL              | 5 (2)  | 5 (2) | 0 (0) |
| GENITAL BURNING SENSATION     | 1 (2)  | 0 (0) | 1 (2) |
| GENITAL DISCOMFORT            | 2 (2)  | 2 (2) | 0 (0) |
| GENITAL DISORDER MALE         | 1 (2)  | 1 (2) | 0 (0) |

---

---

|                                         |        |        |        |
|-----------------------------------------|--------|--------|--------|
| GENITAL ITCHING                         | 5 (2)  | 2 (2)  | 3 (2)  |
| GENITAL ITCHING FEMALE                  | 1 (2)  | 1 (2)  | 0 (0)  |
| GENITAL SWELLING                        | 1 (2)  | 1 (2)  | 0 (0)  |
| GLANDULAR FEVER                         | 1 (2)  | 1 (2)  | 0 (0)  |
| GLOBUS FEELING IN PHARYNX               | 1 (2)  | 1 (2)  | 0 (0)  |
| GLOMERULAR FILTRATION RATE<br>DECREASED | 1 (2)  | 1 (2)  | 0 (0)  |
| GLUTEN INTOLERANCE                      | 1 (2)  | 0 (0)  | 1 (2)  |
| GOUT ATTACK                             | 1 (2)  | 1 (2)  | 0 (0)  |
| GRITTY EYES                             | 1 (2)  | 1 (2)  | 0 (0)  |
| GROIN PAIN                              | 1 (2)  | 0 (0)  | 1 (2)  |
| GUM BLEEDING                            | 1 (2)  | 0 (0)  | 1 (2)  |
| GUM DISORDER                            | 1 (2)  | 1 (2)  | 0 (0)  |
| GUM RECESSION                           | 1 (2)  | 1 (2)  | 0 (0)  |
| GUM SWELLING                            | 1 (2)  | 1 (2)  | 0 (0)  |
| GYNAECOMASTIA                           | 1 (2)  | 1 (2)  | 0 (0)  |
| HAEMOGLOBIN LOW                         | 1 (2)  | 1 (2)  | 0 (0)  |
| HAEMORRHAGIC STROKE                     | 1 (2)  | 1 (2)  | 0 (0)  |
| HAEMORRHOIDS                            | 1 (2)  | 1 (2)  | 0 (0)  |
| HAEMORRHOIDS AGGRAVATED                 | 1 (2)  | 1 (2)  | 0 (0)  |
| HAIR COLOUR GRAYING                     | 1 (2)  | 1 (2)  | 0 (0)  |
| HAIR DISCOLOURATION                     | 1 (2)  | 1 (2)  | 0 (0)  |
| HAIR LOSS                               | 17 (2) | 7 (2)  | 10 (2) |
| HAIR TEXTURE ABNORMAL                   | 1 (2)  | 1 (2)  | 0 (0)  |
| HAIR THINNING                           | 5 (2)  | 2 (2)  | 3 (2)  |
| HALLUCINATION                           | 1 (2)  | 1 (2)  | 0 (0)  |
| HALLUCINATIONS                          | 6 (2)  | 5 (2)  | 1 (2)  |
| HAND PAIN                               | 1 (2)  | 1 (2)  | 0 (0)  |
| HAND SWELLING                           | 1 (2)  | 1 (2)  | 0 (0)  |
| HAND-FOOT-AND-MOUTH DISEASE             | 1 (2)  | 1 (2)  | 0 (0)  |
| HANDS WEAKNESS OF                       | 1 (2)  | 1 (2)  | 0 (0)  |
| HEAD PAIN                               | 7 (2)  | 7 (2)  | 0 (0)  |
| HEAD PRESSURE                           | 1 (2)  | 1 (2)  | 0 (0)  |
| HEAD THROBBING                          | 1 (2)  | 0 (0)  | 1 (2)  |
| HEADACHE                                | 77 (2) | 65 (2) | 12 (2) |
| HEADACHE DULL                           | 2 (2)  | 2 (2)  | 0 (0)  |
| HEALING DELAYED                         | 1 (2)  | 1 (2)  | 0 (0)  |
| HEARING IMPAIRED                        | 2 (2)  | 2 (2)  | 0 (0)  |
| HEARING LOSS                            | 1 (2)  | 0 (0)  | 1 (2)  |
| HEARING LOSS BILATERAL                  | 1 (2)  | 0 (0)  | 1 (2)  |
| HEART ATTACK                            | 1 (2)  | 1 (2)  | 0 (0)  |
| HEART DISORDER                          | 1 (2)  | 1 (2)  | 0 (0)  |
| HEART FLUTTERING                        | 1 (2)  | 0 (0)  | 1 (2)  |
| HEART POUNDING                          | 5 (2)  | 2 (2)  | 3 (2)  |
| HEART RACING                            | 5 (2)  | 3 (2)  | 2 (2)  |
| HEART RATE HIGH                         | 3 (2)  | 2 (2)  | 1 (2)  |

---

---

|                               |        |        |       |
|-------------------------------|--------|--------|-------|
| HEART RATE INCREASED          | 8 (2)  | 8 (2)  | 0 (0) |
| HEART RATE IRREGULAR          | 3 (2)  | 2 (2)  | 1 (2) |
| HEARTBEATS IRREGULAR          | 1 (2)  | 1 (2)  | 0 (0) |
| HEARTBEATS SKIPPED            | 1 (2)  | 1 (2)  | 0 (0) |
| HEARTBURN                     | 13 (2) | 6 (2)  | 7 (2) |
| HEAT INTOLERANCE              | 2 (2)  | 2 (2)  | 0 (0) |
| HEAT SENSITIVITY              | 1 (2)  | 1 (2)  | 0 (0) |
| HEAVINESS IN LIMBS            | 1 (2)  | 1 (2)  | 0 (0) |
| HEAVY PERIODS                 | 2 (2)  | 2 (2)  | 0 (0) |
| HEAVY SWEATING                | 1 (2)  | 1 (2)  | 0 (0) |
| HEMIPARESIS                   | 1 (2)  | 1 (2)  | 0 (0) |
| HENoch-SCHONLEIN PURPURA      |        |        |       |
| NEPHRITIS                     | 1 (2)  | 1 (2)  | 0 (0) |
| HIGH TEMPERATURE              | 17 (2) | 13 (2) | 4 (2) |
| HIVES                         | 6 (2)  | 2 (2)  | 4 (2) |
| HOARSE VOICE                  | 1 (2)  | 1 (2)  | 0 (0) |
| HOARSENESS                    | 1 (2)  | 1 (2)  | 0 (0) |
| HOARSENESS OF VOICE           | 1 (2)  | 1 (2)  | 0 (0) |
| HOSTILITY                     | 1 (2)  | 1 (2)  | 0 (0) |
| HOT FLASHES                   | 1 (2)  | 1 (2)  | 0 (0) |
| HOT FLUSHES                   | 5 (2)  | 1 (2)  | 4 (2) |
| HUNGER                        | 2 (2)  | 2 (2)  | 0 (0) |
| HUNGER ABNORMAL               | 1 (2)  | 0 (0)  | 1 (2) |
| HYPERAESTHESIA SKIN           | 1 (2)  | 1 (2)  | 0 (0) |
| HYPERSENSITIVITY              | 2 (2)  | 2 (2)  | 0 (0) |
| HYPERSEXUALITY                | 1 (2)  | 1 (2)  | 0 (0) |
| HYPERMOMNIA                   | 2 (2)  | 2 (2)  | 0 (0) |
| HYPERTENSION                  | 1 (2)  | 1 (2)  | 0 (0) |
| HYPERTHYROIDISM               | 1 (2)  | 0 (0)  | 1 (2) |
| HYPOGLYCAEMIA                 | 1 (2)  | 1 (2)  | 0 (0) |
| HYPOGLYCAEMIC EPISODE         | 1 (2)  | 1 (2)  | 0 (0) |
| HYPOMIDROSIS                  | 1 (2)  | 1 (2)  | 0 (0) |
| HYPOMANIA                     | 1 (2)  | 1 (2)  | 0 (0) |
| HYPONATRAEMIA                 | 1 (2)  | 1 (2)  | 0 (0) |
| HYPOTENSION                   | 1 (2)  | 1 (2)  | 0 (0) |
| HYPOTHYROIDISM                | 6 (2)  | 5 (2)  | 1 (2) |
| HYSTERIA                      | 1 (2)  | 0 (0)  | 1 (2) |
| IDIOPATHIC PULMONARY FIBROSIS | 1 (2)  | 1 (2)  | 0 (0) |
| ILL FEELING                   | 2 (2)  | 2 (2)  | 0 (0) |
| IMPAIRED LIVER FUNCTION       | 1 (2)  | 1 (2)  | 0 (0) |
| INABILITY TO ORGASM           | 4 (2)  | 1 (2)  | 3 (2) |
| INCORRECT STORAGE OF DRUG     | 1 (2)  | 1 (2)  | 0 (0) |
| INCREASED APPETITE            | 1 (2)  | 1 (2)  | 0 (0) |
| INCREASED BOWEL FREQUENCY     | 2 (2)  | 2 (2)  | 0 (0) |
| INCREASED STOOL FREQUENCY     | 1 (2)  | 1 (2)  | 0 (0) |
| INCREASED THIRST              | 1 (2)  | 1 (2)  | 0 (0) |

---

|                             |        |        |        |
|-----------------------------|--------|--------|--------|
| INCREASED URINARY FREQUENCY | 3 (2)  | 3 (2)  | 0 (0)  |
| INDIGESTION                 | 3 (2)  | 3 (2)  | 0 (0)  |
| INFECTION SUSCEPTIBILITY    |        |        |        |
| INCREASED                   | 1 (2)  | 1 (2)  | 0 (0)  |
| INFECTION VIA VACCINEE      | 3 (2)  | 3 (2)  | 0 (0)  |
| INFLAMMATION LOCALISED      | 2 (2)  | 2 (2)  | 0 (0)  |
| INGROWN HAIR                | 1 (2)  | 1 (2)  | 0 (0)  |
| INHIBITORY DRUG INTERACTION | 2 (2)  | 2 (2)  | 0 (0)  |
| INJECTION SITE ABSCESS      | 1 (2)  | 1 (2)  | 0 (0)  |
| INJECTION SITE DISCHARGE    | 1 (2)  | 1 (2)  | 0 (0)  |
| INJECTION SITE FAT NECROSIS | 1 (2)  | 1 (2)  | 0 (0)  |
| INJECTION SITE INFECTION    | 1 (2)  | 1 (2)  | 0 (0)  |
| INJECTION SITE NUMBNESS     | 1 (2)  | 1 (2)  | 0 (0)  |
| INR INCREASED               | 1 (2)  | 1 (2)  | 0 (0)  |
| INSOMNIA                    | 33 (2) | 20 (2) | 13 (2) |
| INTENTIONAL OVERDOSE        | 1 (2)  | 1 (2)  | 0 (0)  |
| INTENTIONAL SELF-INJURY     | 1 (2)  | 1 (2)  | 0 (0)  |
| INTERMITTENT FEVER          | 1 (2)  | 1 (2)  | 0 (0)  |
| INTESTINAL BACTERIA FLORA   |        |        |        |
| DISTURBANCE                 | 1 (2)  | 1 (2)  | 0 (0)  |
| INTRACRANIAL HYPERTENSION   | 1 (2)  | 1 (2)  | 0 (0)  |
| INTRUSIVE THOUGHTS          | 3 (2)  | 3 (2)  | 0 (0)  |
| IRREGULAR MENSTRUATION      | 1 (2)  | 1 (2)  | 0 (0)  |
| IRREGULAR PERIODS           | 1 (2)  | 1 (2)  | 0 (0)  |
| IRREGULAR PULSE             | 1 (2)  | 1 (2)  | 0 (0)  |
| IRRITABILITY                | 7 (2)  | 5 (2)  | 2 (2)  |
| IRRITABLE                   | 8 (2)  | 6 (2)  | 2 (2)  |
| IRRITABLE BOWEL SYNDROME    | 2 (2)  | 2 (2)  | 0 (0)  |
| IRRITABLE BOWEL SYNDROME    |        |        |        |
| AGGRAVATED                  | 1 (2)  | 1 (2)  | 0 (0)  |
| ITCH                        | 1 (2)  | 1 (2)  | 0 (0)  |
| ITCHING                     | 19 (2) | 18 (2) | 1 (2)  |
| ITCHING ALL OVER            | 7 (2)  | 3 (2)  | 4 (2)  |
| ITCHING BOTH HANDS          | 3 (2)  | 3 (2)  | 0 (0)  |
| ITCHING EYES                | 1 (2)  | 1 (2)  | 0 (0)  |
| ITCHY                       | 11 (2) | 10 (2) | 1 (2)  |
| ITCHY EYES                  | 1 (2)  | 1 (2)  | 0 (0)  |
| ITCHY RASH                  | 8 (2)  | 5 (2)  | 3 (2)  |
| ITCHY SCALP                 | 3 (2)  | 1 (2)  | 2 (2)  |
| ITCHY SKIN                  | 8 (2)  | 6 (2)  | 2 (2)  |
| JAUNDICE                    | 2 (2)  | 1 (2)  | 1 (2)  |
| JAW PAIN                    | 1 (2)  | 1 (2)  | 0 (0)  |
| JAW STIFFNESS               | 1 (2)  | 0 (0)  | 1 (2)  |
| JERKINESS                   | 2 (2)  | 2 (2)  | 0 (0)  |
| JOINT ACHE                  | 3 (2)  | 3 (2)  | 0 (0)  |
| JOINT CREPITATION           | 1 (2)  | 1 (2)  | 0 (0)  |
| JOINT DISORDER              | 1 (2)  | 1 (2)  | 0 (0)  |

---

|                          |        |        |       |
|--------------------------|--------|--------|-------|
| JOINT INFLAMMATION       | 1 (2)  | 1 (2)  | 0 (0) |
| JOINT PAIN               | 24 (2) | 18 (2) | 6 (2) |
| JOINT STIFFNESS          | 3 (2)  | 3 (2)  | 0 (0) |
| JOINT SWELLING           | 3 (2)  | 3 (2)  | 0 (0) |
| KERATOSIS PILARIS        | 1 (2)  | 1 (2)  | 0 (0) |
| KIDNEY PAIN              | 2 (2)  | 2 (2)  | 0 (0) |
| KNEE ARTHRITIS           | 1 (2)  | 1 (2)  | 0 (0) |
| KNEE PAIN                | 3 (2)  | 2 (2)  | 1 (2) |
| KNEE SWELLING            | 1 (2)  | 1 (2)  | 0 (0) |
| LACK OF COORDINATION     | 2 (2)  | 0 (0)  | 2 (2) |
| LACK OF DRUG EFFECT      | 4 (2)  | 3 (2)  | 1 (2) |
| LACK OF MOTIVATION       | 5 (2)  | 5 (2)  | 0 (0) |
| LACK OF VACCINATION SITE |        |        |       |
| ROTATION                 | 1 (2)  | 1 (2)  | 0 (0) |
| LACTOSE INTOLERANCE      | 1 (2)  | 0 (0)  | 1 (2) |
| LATE PERIOD              | 1 (2)  | 1 (2)  | 0 (0) |
| LEFT BUNDLE BRANCH BLOCK | 1 (2)  | 1 (2)  | 0 (0) |
| LEG CRAMPS               | 4 (2)  | 4 (2)  | 0 (0) |
| LEG PAIN                 | 5 (2)  | 5 (2)  | 0 (0) |
| LETHARGIC                | 4 (2)  | 4 (2)  | 0 (0) |
| LETHARGY                 | 10 (2) | 5 (2)  | 5 (2) |
| LIBIDO DECREASED         | 3 (2)  | 3 (2)  | 0 (0) |
| LIBIDO INCREASED         | 1 (2)  | 1 (2)  | 0 (0) |
| LIGHT PERIODS            | 2 (2)  | 2 (2)  | 0 (0) |
| LIGHT SENSITIVITY TO EYE | 3 (2)  | 2 (2)  | 1 (2) |
| LIGHT SLEEP              | 1 (2)  | 1 (2)  | 0 (0) |
| LIGHT-HEADED             | 2 (2)  | 2 (2)  | 0 (0) |
| LIGHTHEADEDNESS          | 5 (2)  | 4 (2)  | 1 (2) |
| LIMB DISCOMFORT          | 1 (2)  | 1 (2)  | 0 (0) |
| LIP PAIN                 | 2 (2)  | 2 (2)  | 0 (0) |
| LIP SWELLING             | 3 (2)  | 3 (2)  | 0 (0) |
| LISTLESS                 | 2 (2)  | 0 (0)  | 2 (2) |
| LIVER INFLAMMATION       | 1 (2)  | 1 (2)  | 0 (0) |
| LIVER PAIN               | 1 (2)  | 0 (0)  | 1 (2) |
| LOCAL SWELLING           | 3 (2)  | 3 (2)  | 0 (0) |
| LOCALISED ERYTHEMA       | 3 (2)  | 3 (2)  | 0 (0) |
| LOCALISED ITCHING        | 7 (2)  | 7 (2)  | 0 (0) |
| LOCALISED MUSCLE PAIN    | 2 (2)  | 2 (2)  | 0 (0) |
| LOCALISED NUMBNESS       | 1 (2)  | 1 (2)  | 0 (0) |
| LOCALISED RASH           | 1 (2)  | 1 (2)  | 0 (0) |
| LOCALISED TINGLING       | 4 (2)  | 4 (2)  | 0 (0) |
| LOOSE BOWEL              | 1 (2)  | 1 (2)  | 0 (0) |
| LOOSE BOWELS             | 2 (2)  | 0 (0)  | 2 (2) |
| LOOSE STOOLS             | 4 (2)  | 2 (2)  | 2 (2) |
| LOSS OF ALL PLEASURE     | 1 (2)  | 0 (0)  | 1 (2) |
| LOSS OF CONFIDENCE       | 1 (2)  | 1 (2)  | 0 (0) |

---

---

|                                |        |        |       |
|--------------------------------|--------|--------|-------|
| LOSS OF ENERGY                 | 2 (2)  | 2 (2)  | 0 (0) |
| LOSS OF EYELASHES              | 1 (2)  | 1 (2)  | 0 (0) |
| LOSS OF INTEREST               | 2 (2)  | 1 (2)  | 1 (2) |
| LOSS OF LIBIDO                 | 7 (2)  | 6 (2)  | 1 (2) |
| LOSS OF MEMORY                 | 1 (2)  | 1 (2)  | 0 (0) |
| LOSS OF SENSATION              | 3 (2)  | 2 (2)  | 1 (2) |
| LOSS OF SMELL                  | 1 (2)  | 1 (2)  | 0 (0) |
| LOSS OF TASTE                  | 4 (2)  | 3 (2)  | 1 (2) |
| LOSS OF VISION                 | 2 (2)  | 1 (2)  | 1 (2) |
| LOSS OF VOICE                  | 1 (2)  | 1 (2)  | 0 (0) |
| LOW BACK PAIN                  | 7 (2)  | 7 (2)  | 0 (0) |
| LOW BLOOD PRESSURE             | 3 (2)  | 1 (2)  | 2 (2) |
| LOW MOOD                       | 6 (2)  | 6 (2)  | 0 (0) |
| LOWER ABDOMINAL PAIN           | 2 (2)  | 2 (2)  | 0 (0) |
| LUMP FEELING IN THROAT         | 2 (2)  | 2 (2)  | 0 (0) |
| LUNG FIBROSIS                  | 1 (2)  | 1 (2)  | 0 (0) |
| LUNG IRRITATION                | 2 (2)  | 2 (2)  | 0 (0) |
| LYMPHADENOPATHY                | 1 (2)  | 1 (2)  | 0 (0) |
| MACROCYTOSIS                   | 1 (2)  | 1 (2)  | 0 (0) |
| MACULOPAPULAR RASH             | 1 (2)  | 1 (2)  | 0 (0) |
| MADAROSIS                      | 1 (2)  | 1 (2)  | 0 (0) |
| MAJOR DEPRESSION               | 1 (2)  | 1 (2)  | 0 (0) |
| MALAISE                        | 2 (2)  | 2 (2)  | 0 (0) |
| MALE SEXUAL DYSFUNCTION        | 1 (2)  | 1 (2)  | 0 (0) |
| MANIA                          | 1 (2)  | 1 (2)  | 0 (0) |
| MANIC                          | 1 (2)  | 1 (2)  | 0 (0) |
| MASS                           | 1 (2)  | 1 (2)  | 0 (0) |
| MEASLES-LIKE RASH              | 2 (2)  | 2 (2)  | 0 (0) |
| MEIBOMIAN GLAND OBSTRUCTION    | 1 (2)  | 1 (2)  | 0 (0) |
| MEMORY IMPAIRED                | 3 (2)  | 3 (2)  | 0 (0) |
| MEMORY IMPAIRMENT              | 4 (2)  | 4 (2)  | 0 (0) |
| MEMORY LOSS                    | 4 (2)  | 2 (2)  | 2 (2) |
| MENSTRUATION INCREASED         | 1 (2)  | 1 (2)  | 0 (0) |
| MENSTRUATION PROLONGED         | 2 (2)  | 1 (2)  | 1 (2) |
| MENTAL CONCENTRATION DIFFICULT | 2 (2)  | 2 (2)  | 0 (0) |
| MENTAL FATIGUE                 | 1 (2)  | 1 (2)  | 0 (0) |
| MENTAL IMPAIRMENT              | 1 (2)  | 0 (0)  | 1 (2) |
| MENTAL STATE ABNORMAL          | 1 (2)  | 1 (2)  | 0 (0) |
| MENTAL STATUS CHANGES          | 1 (2)  | 1 (2)  | 0 (0) |
| METABOLIC ACIDOSIS             | 1 (2)  | 1 (2)  | 0 (0) |
| MIGRAINE                       | 13 (2) | 12 (2) | 1 (2) |
| MIGRAINE HEADACHE              | 3 (2)  | 0 (0)  | 3 (2) |
| MIGRAINE WITH AURA             | 2 (2)  | 1 (2)  | 1 (2) |
| MINERAL DEFICIENCY             | 1 (2)  | 1 (2)  | 0 (0) |
| MISCARRIAGE                    | 1 (2)  | 1 (2)  | 0 (0) |
| MOOD ALTERED                   | 1 (2)  | 1 (2)  | 0 (0) |

---



---

|                            |        |        |        |
|----------------------------|--------|--------|--------|
| MOOD CHANGE                | 5 (2)  | 4 (2)  | 1 (2)  |
| MOOD SWINGS                | 9 (2)  | 7 (2)  | 2 (2)  |
| MOTION SICKNESS            | 1 (2)  | 1 (2)  | 0 (0)  |
| MOUTH MOVEMENT IMPAIRED    | 1 (2)  | 1 (2)  | 0 (0)  |
| MOUTH ULCER                | 2 (2)  | 2 (2)  | 0 (0)  |
| MOUTH ULCERATION           | 2 (2)  | 2 (2)  | 0 (0)  |
| MOVEMENTS INVOLUNTARY      | 1 (2)  | 0 (0)  | 1 (2)  |
| MUCUS DISCHARGE            | 1 (2)  | 1 (2)  | 0 (0)  |
| MULTIPLE ALLERGIES         | 1 (2)  | 1 (2)  | 0 (0)  |
| MUSCLE ACHE                | 12 (2) | 9 (2)  | 3 (2)  |
| MUSCLE CRAMPS              | 1 (2)  | 1 (2)  | 0 (0)  |
| MUSCLE FATIGUE             | 2 (2)  | 0 (0)  | 2 (2)  |
| MUSCLE PAIN                | 17 (2) | 15 (2) | 2 (2)  |
| MUSCLE SPASM               | 2 (2)  | 1 (2)  | 1 (2)  |
| MUSCLE SPASMS              | 2 (2)  | 2 (2)  | 0 (0)  |
| MUSCLE TIGHTNESS           | 3 (2)  | 2 (2)  | 1 (2)  |
| MUSCLE TWITCHING           | 5 (2)  | 3 (2)  | 2 (2)  |
| MUSCLE WASTING             | 1 (2)  | 1 (2)  | 0 (0)  |
| MUSCLE WEAKNESS            | 7 (2)  | 7 (2)  | 0 (0)  |
| MUSCLE WEAKNESS UPPER LIMB | 1 (2)  | 1 (2)  | 0 (0)  |
| MUSCULOSKELETAL PAIN       | 2 (2)  | 2 (2)  | 0 (0)  |
| MYELITIS                   | 1 (2)  | 1 (2)  | 0 (0)  |
| NAIL RIDGING               | 1 (2)  | 1 (2)  | 0 (0)  |
| NAPPY RASH                 | 1 (2)  | 1 (2)  | 0 (0)  |
| NASAL CONGESTION           | 6 (2)  | 5 (2)  | 1 (2)  |
| NASAL DRYNESS              | 1 (2)  | 1 (2)  | 0 (0)  |
| NASAL SINUS CONGESTION     | 1 (2)  | 1 (2)  | 0 (0)  |
| NASAL STUFFINESS           | 2 (2)  | 0 (0)  | 2 (2)  |
| NAUSEA                     | 78 (2) | 54 (2) | 24 (2) |
| NAUSEOUS                   | 2 (2)  | 1 (2)  | 1 (2)  |
| NEAR FAINTING              | 2 (2)  | 1 (2)  | 1 (2)  |
| NECK PAIN                  | 9 (2)  | 9 (2)  | 0 (0)  |
| NECK SWELLING              | 3 (2)  | 3 (2)  | 0 (0)  |
| NEGATIVE THOUGHTS          | 3 (2)  | 3 (2)  | 0 (0)  |
| NEONATAL SEIZURES          | 1 (2)  | 1 (2)  | 0 (0)  |
| NERVOUS                    | 1 (2)  | 1 (2)  | 0 (0)  |
| NERVOUS BREAKDOWN          | 1 (2)  | 1 (2)  | 0 (0)  |
| NERVOUS SYSTEM DISORDER    | 1 (2)  | 1 (2)  | 0 (0)  |
| NEURALGIA                  | 2 (2)  | 2 (2)  | 0 (0)  |
| NEUROPATHY                 | 2 (2)  | 2 (2)  | 0 (0)  |
| NEUROTIC REACTION          | 1 (2)  | 1 (2)  | 0 (0)  |
| NIGHT SWEAT                | 1 (2)  | 1 (2)  | 0 (0)  |
| NIGHT SWEATS               | 8 (2)  | 4 (2)  | 4 (2)  |
| NIGHT TERRORS              | 1 (2)  | 0 (0)  | 1 (2)  |
| NIGHTMARE                  | 3 (2)  | 3 (2)  | 0 (0)  |
| NIGHTMARES                 | 7 (2)  | 5 (2)  | 2 (2)  |

---

---

|                               |        |        |       |
|-------------------------------|--------|--------|-------|
| NIPPLE TENDERNESS             | 1 (2)  | 1 (2)  | 0 (0) |
| NOCTURIA                      | 1 (2)  | 1 (2)  | 0 (0) |
| NOCTURNAL HEADACHE            | 1 (2)  | 1 (2)  | 0 (0) |
| NOCTURNAL LEG MUSCLE CRAMPS   | 1 (2)  | 0 (0)  | 1 (2) |
| NOISES IN HEAD                | 1 (2)  | 1 (2)  | 0 (0) |
| NON-CARDIAC CHEST PAIN        | 1 (2)  | 0 (0)  | 1 (2) |
| NOSE BLEED                    | 5 (2)  | 2 (2)  | 3 (2) |
| NOSE BLEEDS                   | 1 (2)  | 1 (2)  | 0 (0) |
| NOSEBLEED                     | 2 (2)  | 2 (2)  | 0 (0) |
| NUMBNESS                      | 4 (2)  | 3 (2)  | 1 (2) |
| NUMBNESS FACIAL               | 1 (2)  | 1 (2)  | 0 (0) |
| NUMBNESS IN FEET              | 1 (2)  | 1 (2)  | 0 (0) |
| NUMBNESS IN HAND              | 1 (2)  | 1 (2)  | 0 (0) |
| NUMBNESS IN LEG               | 1 (2)  | 1 (2)  | 0 (0) |
| NUMBNESS LOCALISED            | 1 (2)  | 1 (2)  | 0 (0) |
| NUMBNESS OF TONGUE            | 2 (2)  | 1 (2)  | 1 (2) |
| NUMBNESS THROAT               | 1 (2)  | 1 (2)  | 0 (0) |
| OBSESSIVE THOUGHTS            | 1 (2)  | 1 (2)  | 0 (0) |
| OBSESSIVE-COMPULSIVE DISORDER | 1 (2)  | 1 (2)  | 0 (0) |
| OCCUPATIONAL EXPOSURE TO DRUG | 1 (2)  | 1 (2)  | 0 (0) |
| OESOPHAGEAL ACID REFLUX       | 1 (2)  | 1 (2)  | 0 (0) |
| OESOPHAGEAL OBSTRUCTION       | 1 (2)  | 1 (2)  | 0 (0) |
| OESOPHAGEAL PAIN              | 1 (2)  | 1 (2)  | 0 (0) |
| OESOPHAGEAL REFLUX            |        |        |       |
| AGGRAVATED                    | 1 (2)  | 1 (2)  | 0 (0) |
| OESOPHAGEAL SPASM             | 1 (2)  | 1 (2)  | 0 (0) |
| OESOPHAGEAL ULCER             | 1 (2)  | 0 (0)  | 1 (2) |
| OILY SKIN                     | 2 (2)  | 2 (2)  | 0 (0) |
| OLFACTORY HALLUCINATION       | 1 (2)  | 1 (2)  | 0 (0) |
| OPTIC NERVE DISORDER          | 1 (2)  | 1 (2)  | 0 (0) |
| ORAL INFECTION                | 1 (2)  | 1 (2)  | 0 (0) |
| ORAL MUCOSAL ERUPTION         | 1 (2)  | 1 (2)  | 0 (0) |
| ORAL NODULE                   | 1 (2)  | 1 (2)  | 0 (0) |
| ORAL THRUSH                   | 3 (2)  | 1 (2)  | 2 (2) |
| OROMANDIBULAR DYSTONIA        | 1 (2)  | 1 (2)  | 0 (0) |
| OSTEOPENIA                    | 1 (2)  | 1 (2)  | 0 (0) |
| OVARIAN CYST                  | 1 (2)  | 0 (0)  | 1 (2) |
| OXYGEN SATURATION DECREASED   | 1 (2)  | 1 (2)  | 0 (0) |
| PAIN                          | 21 (2) | 21 (2) | 0 (0) |
| PAIN AGGRAVATED               | 1 (2)  | 1 (2)  | 0 (0) |
| PAIN ANKLE                    | 1 (2)  | 1 (2)  | 0 (0) |
| PAIN BEHIND EYES              | 1 (2)  | 1 (2)  | 0 (0) |
| PAIN BURNING                  | 1 (2)  | 1 (2)  | 0 (0) |
| PAIN IN ANKLE                 | 1 (2)  | 1 (2)  | 0 (0) |
| PAIN IN ARM                   | 5 (2)  | 5 (2)  | 0 (0) |
| PAIN IN EXTREMITY             | 3 (2)  | 3 (2)  | 0 (0) |

---

---

|                                 |        |        |       |
|---------------------------------|--------|--------|-------|
| PAIN IN EYES                    | 1 (2)  | 1 (2)  | 0 (0) |
| PAIN IN FINGERS                 | 1 (2)  | 1 (2)  | 0 (0) |
| PAIN IN HIP                     | 1 (2)  | 0 (0)  | 1 (2) |
| PAIN IN LIMB                    | 4 (2)  | 4 (2)  | 0 (0) |
| PAIN LEGS                       | 2 (2)  | 2 (2)  | 0 (0) |
| PAINFUL ARM                     | 2 (2)  | 2 (2)  | 0 (0) |
| PAINFUL EYE MOVEMENT            | 1 (2)  | 1 (2)  | 0 (0) |
| PAINFUL FEET                    | 1 (2)  | 1 (2)  | 0 (0) |
| PAINFUL INTERCOURSE             | 1 (2)  | 0 (0)  | 1 (2) |
| PAINFUL JOINTS                  | 1 (2)  | 1 (2)  | 0 (0) |
| PAINFUL PERIODS                 | 2 (2)  | 2 (2)  | 0 (0) |
| PAINFUL URINATION               | 1 (2)  | 1 (2)  | 0 (0) |
| PALE                            | 1 (2)  | 1 (2)  | 0 (0) |
| PALPITATIONS                    | 18 (2) | 14 (2) | 4 (2) |
| PANCREATIC ENZYME ABNORMALITY   | 1 (2)  | 1 (2)  | 0 (0) |
| PANCREATIC INFLAMMATION         | 1 (2)  | 1 (2)  | 0 (0) |
| PANIC ATTACK                    | 1 (2)  | 1 (2)  | 0 (0) |
| PANIC ATTACKS                   | 5 (2)  | 4 (2)  | 1 (2) |
| PAPILLOEDEMA                    | 1 (2)  | 1 (2)  | 0 (0) |
| PAPULAR RASH                    | 2 (2)  | 1 (2)  | 1 (2) |
| PAPULE                          | 6 (2)  | 6 (2)  | 0 (0) |
| PARAESTHESIA                    | 3 (2)  | 3 (2)  | 0 (0) |
| PARALYZED                       | 1 (2)  | 0 (0)  | 1 (2) |
| PARANOIA                        | 2 (2)  | 1 (2)  | 1 (2) |
| PARTIAL SEIZURES                | 1 (2)  | 0 (0)  | 1 (2) |
| PEAK FLOW ABNORMAL              | 1 (2)  | 1 (2)  | 0 (0) |
| PEELING MOUTH                   | 1 (2)  | 0 (0)  | 1 (2) |
| PENILE DISCHARGE                | 1 (2)  | 1 (2)  | 0 (0) |
| PENILE PAIN                     | 2 (2)  | 2 (2)  | 0 (0) |
| PENILE SIZE REDUCED             | 1 (2)  | 1 (2)  | 0 (0) |
| PENILE SWELLING                 | 2 (2)  | 2 (2)  | 0 (0) |
| PENILE THRUSH                   | 1 (2)  | 0 (0)  | 1 (2) |
| PERFORATION OF PREPYLORIC ULCER | 1 (2)  | 1 (2)  | 0 (0) |
| PERIOD PAINS                    | 2 (2)  | 2 (2)  | 0 (0) |
| PERIORBITAL SWELLING            | 1 (2)  | 1 (2)  | 0 (0) |
| PERIPHERAL SWELLING             | 4 (2)  | 4 (2)  | 0 (0) |
| PERSECUTORY DELUSION            | 1 (2)  | 1 (2)  | 0 (0) |
| PERSISTENT COUGH                | 1 (2)  | 1 (2)  | 0 (0) |
| PERSISTENT CRYING               | 2 (2)  | 0 (0)  | 2 (2) |
| PERSISTENT VOMITING             | 6 (2)  | 1 (2)  | 5 (2) |
| PERSONALITY CHANGE              | 1 (2)  | 1 (2)  | 0 (0) |
| PETECHIA                        | 1 (2)  | 1 (2)  | 0 (0) |
| PETECHIAL RASH                  | 1 (2)  | 1 (2)  | 0 (0) |
| PHIMOSIS                        | 1 (2)  | 1 (2)  | 0 (0) |
| PHOTOSENSITIVITY                | 1 (2)  | 1 (2)  | 0 (0) |
| PILES                           | 1 (2)  | 1 (2)  | 0 (0) |

---

|                                 |        |        |       |
|---------------------------------|--------|--------|-------|
| PINS AND NEEDLES                | 15 (2) | 11 (2) | 4 (2) |
| PITUITARY DISORDER              | 1 (2)  | 1 (2)  | 0 (0) |
| PLANTAR FASCIITIS               | 1 (2)  | 1 (2)  | 0 (0) |
| POLYCYSTIC OVARIAN SYNDROME     | 1 (2)  | 1 (2)  | 0 (0) |
| POLYMYALGIA RHEUMATICA          | 1 (2)  | 1 (2)  | 0 (0) |
| POOR SLEEP                      | 1 (2)  | 1 (2)  | 0 (0) |
| POSTERIOR VITREOUS DETACHMENT   | 1 (2)  | 1 (2)  | 0 (0) |
| POST-TRAUMATIC STRESS DISORDER  | 1 (2)  | 1 (2)  | 0 (0) |
| POSTURAL ORTHOSTATIC            |        |        |       |
| TACHYCARDIA SYND..              | 1 (2)  | 1 (2)  | 0 (0) |
| POTASSIUM LOW                   | 1 (2)  | 1 (2)  | 0 (0) |
| POUNING IN HEAD                 | 1 (2)  | 1 (2)  | 0 (0) |
| PRE-EXISTING CONDITION IMPROVED | 1 (2)  | 1 (2)  | 0 (0) |
| PREMENSTRUAL SYNDROME           | 2 (2)  | 2 (2)  | 0 (0) |
| PREPARATORY ACTIONS TOWARD      |        |        |       |
| IMMINENT S..                    | 1 (2)  | 1 (2)  | 0 (0) |
| PRESCRIBED UNDERDOSE            | 1 (2)  | 1 (2)  | 0 (0) |
| PRESSURE IN VAGINA              | 1 (2)  | 1 (2)  | 0 (0) |
| PRODUCT FORMULATION ISSUE       | 1 (2)  | 1 (2)  | 0 (0) |
| PRODUCT LOT NUMBER ISSUE        | 1 (2)  | 1 (2)  | 0 (0) |
| PRODUCT LOT SPECIFIC ISSUE      | 2 (2)  | 2 (2)  | 0 (0) |
| PRODUCT QUALITY ISSUE           | 2 (2)  | 2 (2)  | 0 (0) |
| PRODUCT SMELL ABNORMAL          | 1 (2)  | 1 (2)  | 0 (0) |
| PRODUCT SUBSTITUTION ISSUE      | 13 (2) | 13 (2) | 0 (0) |
| PRODUCT SUBSTITUTION ISSUE      |        |        |       |
| BRAND TO B..                    | 6 (2)  | 6 (2)  | 0 (0) |
| PRODUCT SUBSTITUTION ISSUE      |        |        |       |
| BRAND TO G..                    | 5 (2)  | 5 (2)  | 0 (0) |
| PRODUCT SUBSTITUTION ISSUE      |        |        |       |
| GENERIC TO..                    | 7 (2)  | 7 (2)  | 0 (0) |
| PRODUCTIVE COUGH                | 2 (2)  | 2 (2)  | 0 (0) |
| PROLACTIN HIGH                  | 1 (2)  | 1 (2)  | 0 (0) |
| PROLONGED PERIODS               | 1 (2)  | 1 (2)  | 0 (0) |
| PROSTATIC DISORDER              | 1 (2)  | 1 (2)  | 0 (0) |
| PROSTATIC PAIN                  | 2 (2)  | 2 (2)  | 0 (0) |
| PRURITUS                        | 1 (2)  | 1 (2)  | 0 (0) |
| PRURITUS AGGRAVATED             | 1 (2)  | 1 (2)  | 0 (0) |
| PSORIASIS AGGRAVATED            | 1 (2)  | 0 (0)  | 1 (2) |
| PSYCHOSIS                       | 2 (2)  | 1 (2)  | 1 (2) |
| PULMONARY EMBOLISM              | 1 (2)  | 0 (0)  | 1 (2) |
| PULSE IRREGULAR                 | 1 (2)  | 1 (2)  | 0 (0) |
| PULSE RATE DECREASED            | 1 (2)  | 1 (2)  | 0 (0) |
| PULSE RATE INCREASED            | 1 (2)  | 1 (2)  | 0 (0) |
| PULSE WEAK                      | 1 (2)  | 1 (2)  | 0 (0) |
| PYREXIA                         | 1 (2)  | 1 (2)  | 0 (0) |
| RAGE                            | 1 (2)  | 1 (2)  | 0 (0) |
| RAISED RASH                     | 3 (2)  | 3 (2)  | 0 (0) |

|                                  |        |        |       |
|----------------------------------|--------|--------|-------|
| RASH                             | 8 (2)  | 6 (2)  | 2 (2) |
| RASH AGGRAVATED                  | 1 (2)  | 1 (2)  | 0 (0) |
| RASH ALL OVER                    | 1 (2)  | 0 (0)  | 1 (2) |
| RASH BOTH LEGS                   | 1 (2)  | 1 (2)  | 0 (0) |
| RASH ON FACE                     | 2 (2)  | 0 (0)  | 2 (2) |
| RASH TRUNK                       | 1 (2)  | 0 (0)  | 1 (2) |
| RAYNAUD'S SYNDROME               | 1 (2)  | 1 (2)  | 0 (0) |
| REACTION TO DRUG EXCIPIENT       | 4 (2)  | 4 (2)  | 0 (0) |
| REACTION TO DRUG EXCIPIENTS      | 1 (2)  | 1 (2)  | 0 (0) |
| RECTAL BLEEDING                  | 3 (2)  | 3 (2)  | 0 (0) |
| RECTAL PAIN                      | 1 (2)  | 0 (0)  | 1 (2) |
| RECURRENT THRUSH                 | 3 (2)  | 3 (2)  | 0 (0) |
| RED BLOTCHES                     | 1 (2)  | 1 (2)  | 0 (0) |
| REDNESS                          | 11 (2) | 11 (2) | 0 (0) |
| REDNESS FACIAL                   | 1 (2)  | 1 (2)  | 0 (0) |
| REDNESS GENERALISED              | 1 (2)  | 1 (2)  | 0 (0) |
| REDNESS MOUTH                    | 1 (2)  | 1 (2)  | 0 (0) |
| REDNESS OF EYES                  | 2 (2)  | 2 (2)  | 0 (0) |
| REDNESS OF LEGS                  | 1 (2)  | 1 (2)  | 0 (0) |
| REFLEXES DECREASED               | 1 (2)  | 1 (2)  | 0 (0) |
| RENAL DISORDER                   | 1 (2)  | 1 (2)  | 0 (0) |
| RESPIRATORY TRACT OEDEMA         | 1 (2)  | 1 (2)  | 0 (0) |
| RESTLESS                         | 1 (2)  | 1 (2)  | 0 (0) |
| RESTLESS LEGS                    | 3 (2)  | 0 (0)  | 3 (2) |
| RESTLESSNESS                     | 5 (2)  | 4 (2)  | 1 (2) |
| RETRACTED PENIS                  | 1 (2)  | 1 (2)  | 0 (0) |
| RHINORRHOEA                      | 1 (2)  | 1 (2)  | 0 (0) |
| RINGING IN EARS                  | 2 (2)  | 0 (0)  | 2 (2) |
| ROTAVIRUS INFECTION              | 1 (2)  | 1 (2)  | 0 (0) |
| RUNNY NOSE                       | 5 (2)  | 4 (2)  | 1 (2) |
| SALIVA DECREASED                 | 1 (2)  | 1 (2)  | 0 (0) |
| SALIVA INCREASED                 | 2 (2)  | 2 (2)  | 0 (0) |
| SALIVA SECRETION INCREASED       | 1 (2)  | 1 (2)  | 0 (0) |
| SCABBING                         | 1 (2)  | 1 (2)  | 0 (0) |
| SCALP TENDERNESS                 | 1 (2)  | 1 (2)  | 0 (0) |
| SECRETION DISCHARGE              | 2 (2)  | 2 (2)  | 0 (0) |
| SEIZURE                          | 2 (2)  | 0 (0)  | 2 (2) |
| SEIZURES                         | 1 (2)  | 1 (2)  | 0 (0) |
| SENSATION OF BLOCK IN EAR        | 1 (2)  | 1 (2)  | 0 (0) |
| SENSATION OF PRESSURE IN EAR     | 1 (2)  | 1 (2)  | 0 (0) |
| SENSATION OF PRESSURE IN EYE     | 1 (2)  | 1 (2)  | 0 (0) |
| SENSITIVITY OF TEETH             | 1 (2)  | 0 (0)  | 1 (2) |
| SEROTONIN SYNDROME               | 2 (2)  | 2 (2)  | 0 (0) |
| SEXUAL FEELING DECREASED         | 1 (2)  | 1 (2)  | 0 (0) |
| SEXUALLY INAPPROPRIATE BEHAVIOUR | 1 (2)  | 1 (2)  | 0 (0) |

---

|                                          |        |        |       |
|------------------------------------------|--------|--------|-------|
| SHAKING                                  | 14 (2) | 13 (2) | 1 (2) |
| SHAKING OF HANDS                         | 3 (2)  | 2 (2)  | 1 (2) |
| SHALLOW BREATHING                        | 3 (2)  | 1 (2)  | 2 (2) |
| SHINGLES                                 | 3 (2)  | 2 (2)  | 1 (2) |
| SHIVERING                                | 5 (2)  | 3 (2)  | 2 (2) |
| SHORTNESS OF BREATH                      | 6 (2)  | 6 (2)  | 0 (0) |
| SHORT-TERM MEMORY LOSS                   | 2 (2)  | 1 (2)  | 1 (2) |
| SHOULDER PAIN                            | 6 (2)  | 6 (2)  | 0 (0) |
| SICKNESS                                 | 16 (2) | 13 (2) | 3 (2) |
| SILENT MIGRAINE                          | 1 (2)  | 1 (2)  | 0 (0) |
| SINUS HEADACHE                           | 1 (2)  | 1 (2)  | 0 (0) |
| SINUS PRESSURE                           | 1 (2)  | 1 (2)  | 0 (0) |
| SINUSITIS                                | 1 (2)  | 0 (0)  | 1 (2) |
| SKIN BURNING SENSATION                   | 1 (2)  | 1 (2)  | 0 (0) |
| SKIN DISCOLOURATION                      | 3 (2)  | 3 (2)  | 0 (0) |
| SKIN ERYTHEMA                            | 1 (2)  | 1 (2)  | 0 (0) |
| SKIN GREASY                              | 1 (2)  | 0 (0)  | 1 (2) |
| SKIN IRRITATION                          | 7 (2)  | 6 (2)  | 1 (2) |
| SKIN LESION                              | 1 (2)  | 1 (2)  | 0 (0) |
| SKIN MASS                                | 2 (2)  | 2 (2)  | 0 (0) |
| SKIN PEELING                             | 3 (2)  | 3 (2)  | 0 (0) |
| SKIN RASH                                | 3 (2)  | 2 (2)  | 1 (2) |
| SKIN RED                                 | 2 (2)  | 2 (2)  | 0 (0) |
| SKIN SCARRING                            | 1 (2)  | 1 (2)  | 0 (0) |
| SLEEP APNEA                              | 1 (2)  | 1 (2)  | 0 (0) |
| SLEEP APNOEA                             | 1 (2)  | 1 (2)  | 0 (0) |
| SLEEP DISTURBANCE                        | 8 (2)  | 8 (2)  | 0 (0) |
| SLEEP EXCESSIVE                          | 4 (2)  | 4 (2)  | 0 (0) |
| SLEEP RESTLESS                           | 1 (2)  | 0 (0)  | 1 (2) |
| SLEEP RHYTHM REVERSAL                    | 1 (2)  | 1 (2)  | 0 (0) |
| SLEEPINESS                               | 6 (2)  | 4 (2)  | 2 (2) |
| SLEEPLESSNESS                            | 3 (2)  | 2 (2)  | 1 (2) |
| SLEEPY                                   | 1 (2)  | 1 (2)  | 0 (0) |
| SLOWED THINKING                          | 2 (2)  | 1 (2)  | 1 (2) |
| SLUGGISHNESS                             | 4 (2)  | 3 (2)  | 1 (2) |
| SLURRED SPEECH                           | 2 (2)  | 2 (2)  | 0 (0) |
| SMALL INTESTINAL BACTERIAL<br>OVERGROWTH | 1 (2)  | 1 (2)  | 0 (0) |
| SMELL LOSS                               | 1 (2)  | 1 (2)  | 0 (0) |
| SNEEZING                                 | 3 (2)  | 3 (2)  | 0 (0) |
| SODIUM LOW                               | 1 (2)  | 1 (2)  | 0 (0) |
| SOMNOLENCE                               | 1 (2)  | 1 (2)  | 0 (0) |
| SORE EYES                                | 1 (2)  | 1 (2)  | 0 (0) |
| SORE GUMS                                | 1 (2)  | 1 (2)  | 0 (0) |
| SORE MOUTH                               | 2 (2)  | 2 (2)  | 0 (0) |
| SORE THROAT                              | 14 (2) | 11 (2) | 3 (2) |

---

---

|                               |        |        |       |
|-------------------------------|--------|--------|-------|
| SORE TONGUE                   | 1 (2)  | 1 (2)  | 0 (0) |
| SORES MOUTH                   | 1 (2)  | 1 (2)  | 0 (0) |
| SOUND SENSITIVITY INCREASED   | 2 (2)  | 2 (2)  | 0 (0) |
| SPACED OUT                    | 2 (2)  | 2 (2)  | 0 (0) |
| SPEECH DISORDER               | 5 (2)  | 5 (2)  | 0 (0) |
| SPEECH IMPAIRMENT NOS         | 2 (2)  | 2 (2)  | 0 (0) |
| SPEECH LOSS                   | 2 (2)  | 1 (2)  | 1 (2) |
| SPINNING SENSATION            | 1 (2)  | 1 (2)  | 0 (0) |
| SPONTANEOUS BRUISING          | 1 (2)  | 1 (2)  | 0 (0) |
| SPOTTING BETWEEN MENSES       | 1 (2)  | 0 (0)  | 1 (2) |
| STEROID WITHDRAWAL SYNDROME   | 1 (2)  | 1 (2)  | 0 (0) |
| STIFF FINGERS                 | 1 (2)  | 1 (2)  | 0 (0) |
| STIFF NECK                    | 3 (2)  | 2 (2)  | 1 (2) |
| STIFFNESS                     | 2 (2)  | 2 (2)  | 0 (0) |
| STIFFNESS SHOULDER            | 1 (2)  | 1 (2)  | 0 (0) |
| STINGING                      | 2 (2)  | 2 (2)  | 0 (0) |
| STINGING MOUTH                | 1 (2)  | 1 (2)  | 0 (0) |
| STINGING SENSATION IN EYES    | 1 (2)  | 1 (2)  | 0 (0) |
| STOMACH ACHE                  | 7 (2)  | 3 (2)  | 4 (2) |
| STOMACH BURNING SENSATION OF  | 2 (2)  | 2 (2)  | 0 (0) |
| STOMACH CRAMPS                | 18 (2) | 11 (2) | 7 (2) |
| STOMACH DISCOMFORT            | 5 (2)  | 2 (2)  | 3 (2) |
| STOMACH PAIN                  | 17 (2) | 14 (2) | 3 (2) |
| STOMACH ULCER                 | 1 (2)  | 1 (2)  | 0 (0) |
| STOMACH UPSET                 | 1 (2)  | 0 (0)  | 1 (2) |
| STOOLS HARD                   | 1 (2)  | 1 (2)  | 0 (0) |
| STRANGE SMELL SENSATION       | 1 (2)  | 1 (2)  | 0 (0) |
| STRESS                        | 1 (2)  | 1 (2)  | 0 (0) |
| STRESS INCONTINENCE           | 1 (2)  | 1 (2)  | 0 (0) |
| STROKE                        | 2 (2)  | 1 (2)  | 1 (2) |
| SUBCONJUNCTIVAL HAEMORRHAGE   | 1 (2)  | 1 (2)  | 0 (0) |
| SUDDEN HEARING LOSS           | 1 (2)  | 1 (2)  | 0 (0) |
| SUGAR CRAVING                 | 1 (2)  | 1 (2)  | 0 (0) |
| SUICIDAL BEHAVIOUR            | 2 (2)  | 2 (2)  | 0 (0) |
| SUICIDAL DEPRESSION           | 9 (2)  | 2 (2)  | 7 (2) |
| SUICIDAL IDEATION             | 17 (2) | 13 (2) | 4 (2) |
| SUICIDE ATTEMPT               | 3 (2)  | 0 (0)  | 3 (2) |
| SUN SENSITIVITY               | 3 (2)  | 0 (0)  | 3 (2) |
| SUNBURN                       | 1 (2)  | 1 (2)  | 0 (0) |
| SUPRAVENTRICULAR TACHYCARDIA  | 1 (2)  | 1 (2)  | 0 (0) |
| SUSPECTED COUNTERFEIT PRODUCT | 1 (2)  | 1 (2)  | 0 (0) |
| SWALLOWING DIFFICULT          | 3 (2)  | 3 (2)  | 0 (0) |
| SWALLOWING IMPAIRED           | 2 (2)  | 2 (2)  | 0 (0) |
| SWALLOWING PAINFUL            | 3 (2)  | 3 (2)  | 0 (0) |
| SWEAT DISCOLOURATION          | 1 (2)  | 1 (2)  | 0 (0) |
| SWEAT ODOUR ABNORMAL          | 1 (2)  | 1 (2)  | 0 (0) |

---

---

|                                    |        |        |       |
|------------------------------------|--------|--------|-------|
| SWEATING                           | 16 (2) | 15 (2) | 1 (2) |
| SWEATING DECREASED                 | 1 (2)  | 1 (2)  | 0 (0) |
| SWEATING INCREASED                 | 1 (2)  | 1 (2)  | 0 (0) |
| SWELLING                           | 2 (2)  | 2 (2)  | 0 (0) |
| SWELLING (R) TESTICLE              | 1 (2)  | 1 (2)  | 0 (0) |
| SWELLING ABDOMEN                   | 1 (2)  | 1 (2)  | 0 (0) |
| SWELLING ARM                       | 1 (2)  | 1 (2)  | 0 (0) |
| SWELLING FACE                      | 2 (2)  | 2 (2)  | 0 (0) |
| SWELLING OF EYELID                 | 3 (2)  | 3 (2)  | 0 (0) |
| SWELLING OF FACE                   | 2 (2)  | 2 (2)  | 0 (0) |
| SWELLING OF FEET                   | 2 (2)  | 2 (2)  | 0 (0) |
| SWELLING OF FINGERS                | 3 (2)  | 3 (2)  | 0 (0) |
| SWELLING OF L KNEE                 | 1 (2)  | 1 (2)  | 0 (0) |
| SWELLING OF LEGS                   | 4 (2)  | 4 (2)  | 0 (0) |
| SWELLING OF LIPS                   | 1 (2)  | 1 (2)  | 0 (0) |
| SWELLING OF TONGUE                 | 2 (2)  | 2 (2)  | 0 (0) |
| SWOLLEN ABDOMEN                    | 1 (2)  | 1 (2)  | 0 (0) |
| SWOLLEN ANKLES                     | 3 (2)  | 3 (2)  | 0 (0) |
| SWOLLEN ARM                        | 1 (2)  | 1 (2)  | 0 (0) |
| SWOLLEN EYES                       | 2 (2)  | 1 (2)  | 1 (2) |
| SWOLLEN GLANDS                     | 1 (2)  | 1 (2)  | 0 (0) |
| SWOLLEN LIPS                       | 2 (2)  | 1 (2)  | 1 (2) |
| SWOLLEN LYMPH NODES                | 1 (2)  | 1 (2)  | 0 (0) |
| SWOLLEN MOUTH                      | 1 (2)  | 1 (2)  | 0 (0) |
| SWOLLEN THUMB                      | 1 (2)  | 1 (2)  | 0 (0) |
| SWOLLEN TONGUE                     | 2 (2)  | 1 (2)  | 1 (2) |
| SYNCOPE                            | 3 (2)  | 3 (2)  | 0 (0) |
| T4 INCREASED                       | 1 (2)  | 1 (2)  | 0 (0) |
| TACHYCARDIA                        | 1 (2)  | 1 (2)  | 0 (0) |
| TARDIVE DYSKINESIA                 | 1 (2)  | 1 (2)  | 0 (0) |
| TASTE BITTER                       | 2 (2)  | 1 (2)  | 1 (2) |
| TASTE BITTER-SALTY                 | 2 (2)  | 2 (2)  | 0 (0) |
| TASTE CHANGED                      | 1 (2)  | 0 (0)  | 1 (2) |
| TASTE DISTURBANCE                  | 3 (2)  | 3 (2)  | 0 (0) |
| TASTE METALLIC                     | 3 (2)  | 3 (2)  | 0 (0) |
| TEARFULNESS                        | 1 (2)  | 0 (0)  | 1 (2) |
| TEETH CHATTERING                   | 1 (2)  | 1 (2)  | 0 (0) |
| TEETH CLENCHING                    | 2 (2)  | 0 (0)  | 2 (2) |
| TEETH GRINDING                     | 2 (2)  | 1 (2)  | 1 (2) |
| TEMPERATURE REGULATION<br>DISORDER | 1 (2)  | 1 (2)  | 0 (0) |
| TENDENCY TO BRUISE EASILY          | 1 (2)  | 1 (2)  | 0 (0) |
| TENDON RUPTURE                     | 1 (2)  | 1 (2)  | 0 (0) |
| TENDONITIS                         | 1 (2)  | 0 (0)  | 1 (2) |
| TENSION HEADACHE                   | 2 (2)  | 0 (0)  | 2 (2) |
| TESTICULAR PAIN                    | 3 (2)  | 1 (2)  | 2 (2) |

---



---

|                                |        |        |       |
|--------------------------------|--------|--------|-------|
| THICK NASAL MUCUS              | 1 (2)  | 1 (2)  | 0 (0) |
| THINKING ABNORMAL              | 1 (2)  | 1 (2)  | 0 (0) |
| THIRST                         | 2 (2)  | 2 (2)  | 0 (0) |
| THIRST DECREASED               | 1 (2)  | 1 (2)  | 0 (0) |
| THOUGHTS OF SELF HARM          | 1 (2)  | 1 (2)  | 0 (0) |
| THROAT CONSTRICTION            | 1 (2)  | 1 (2)  | 0 (0) |
| THROAT IRRITATION              | 2 (2)  | 2 (2)  | 0 (0) |
| THROAT SWELLING                | 4 (2)  | 4 (2)  | 0 (0) |
| THRUSH                         | 2 (2)  | 1 (2)  | 1 (2) |
| THRUSH VAGINAL                 | 2 (2)  | 1 (2)  | 1 (2) |
| TINGLING                       | 3 (2)  | 3 (2)  | 0 (0) |
| TINGLING FEET/HANDS            | 2 (2)  | 1 (2)  | 1 (2) |
| TINGLING LIPS                  | 2 (2)  | 2 (2)  | 0 (0) |
| TINGLING MOUTH                 | 2 (2)  | 2 (2)  | 0 (0) |
| TINGLING OF EXTREMITY          | 1 (2)  | 1 (2)  | 0 (0) |
| TINGLING SENSATION             | 2 (2)  | 1 (2)  | 1 (2) |
| TINGLING SKIN                  | 1 (2)  | 0 (0)  | 1 (2) |
| TINGLING THROAT                | 2 (2)  | 2 (2)  | 0 (0) |
| TINGLING TONGUE                | 2 (2)  | 1 (2)  | 1 (2) |
| TINNITUS                       | 9 (2)  | 6 (2)  | 3 (2) |
| TIRED ALL THE TIME             | 7 (2)  | 2 (2)  | 5 (2) |
| TIREDNESS                      | 28 (2) | 22 (2) | 6 (2) |
| TONGUE BLACK                   | 1 (2)  | 1 (2)  | 0 (0) |
| TONGUE PAIN                    | 1 (2)  | 1 (2)  | 0 (0) |
| TONGUE ULCERATION              | 1 (2)  | 1 (2)  | 0 (0) |
| TONGUE WHITE                   | 2 (2)  | 1 (2)  | 1 (2) |
| TOOTH COLOURED YELLOW          | 1 (2)  | 1 (2)  | 0 (0) |
| TOOTH DECAY                    | 1 (2)  | 0 (0)  | 1 (2) |
| TOOTH PAIN                     | 1 (2)  | 1 (2)  | 0 (0) |
| TOTAL LUNG CAPACITY DECREASED  | 1 (2)  | 1 (2)  | 0 (0) |
| TREMBLING                      | 2 (2)  | 1 (2)  | 1 (2) |
| TREMOR                         | 5 (2)  | 4 (2)  | 1 (2) |
| TREMOR OF HANDS                | 1 (2)  | 1 (2)  | 0 (0) |
| TYPE 2 DIABETES MELLITUS       | 1 (2)  | 1 (2)  | 0 (0) |
| UNABLE TO EAT                  | 1 (2)  | 0 (0)  | 1 (2) |
| UNCONSCIOUS                    | 1 (2)  | 1 (2)  | 0 (0) |
| UNCONTROLLABLE CRYING          | 1 (2)  | 1 (2)  | 0 (0) |
| UNEXPECTED THERAPEUTIC BENEFIT | 1 (2)  | 1 (2)  | 0 (0) |
| UNINTENTIONAL WEIGHT LOSS      | 3 (2)  | 3 (2)  | 0 (0) |
| UNRESPONSIVE TO STIMULI        | 1 (2)  | 1 (2)  | 0 (0) |
| UNSTEADINESS                   | 4 (2)  | 3 (2)  | 1 (2) |
| UPSET STOMACH                  | 8 (2)  | 6 (2)  | 2 (2) |
| URINARY FREQUENCY              | 2 (2)  | 2 (2)  | 0 (0) |
| URINARY INCONTINENCE           | 1 (2)  | 0 (0)  | 1 (2) |
| URINARY RETENTION              | 1 (2)  | 0 (0)  | 1 (2) |
| URINARY TRACT INFECTION        | 2 (2)  | 2 (2)  | 0 (0) |

---

---

|                                       |       |       |       |
|---------------------------------------|-------|-------|-------|
| URINARY URGENCY                       | 2 (2) | 2 (2) | 0 (0) |
| URINATION DIFFICULTY                  | 7 (2) | 7 (2) | 0 (0) |
| URINATION FREQUENCY OF                | 1 (2) | 1 (2) | 0 (0) |
| URINE COLOURING RED                   | 1 (2) | 1 (2) | 0 (0) |
| URINE DISCOLOURATION                  | 1 (2) | 1 (2) | 0 (0) |
| URINE FLOW DECREASED                  | 1 (2) | 1 (2) | 0 (0) |
| URINE ODOUR ABNORMAL                  | 4 (2) | 2 (2) | 2 (2) |
| URINE ODOUR FOUL                      | 1 (2) | 1 (2) | 0 (0) |
| URINE OUTPUT DECREASED                | 1 (2) | 1 (2) | 0 (0) |
| URTICARIAL RASH                       | 2 (2) | 2 (2) | 0 (0) |
| UTERINE FIBROIDS AGGRAVATED           | 1 (2) | 1 (2) | 0 (0) |
| UTERINE PAIN                          | 1 (2) | 1 (2) | 0 (0) |
| VACCINATION SITE BRUISING             | 1 (2) | 1 (2) | 0 (0) |
| VACCINATION SITE ERYTHEMA             | 3 (2) | 3 (2) | 0 (0) |
| VACCINATION SITE INDURATION           | 2 (2) | 2 (2) | 0 (0) |
| VACCINATION SITE LUMP                 | 3 (2) | 3 (2) | 0 (0) |
| VACCINATION SITE PAIN                 | 6 (2) | 6 (2) | 0 (0) |
| VACCINATION SITE RASH                 | 1 (2) | 1 (2) | 0 (0) |
| VACCINATION SITE SWELLING             | 5 (2) | 5 (2) | 0 (0) |
| VACCINATION SITE TENDERNESS           | 2 (2) | 1 (2) | 1 (2) |
| VACCINATION SITE WARMTH               | 1 (2) | 1 (2) | 0 (0) |
| VAGINAL BLEEDING                      | 8 (2) | 4 (2) | 4 (2) |
| VAGINAL DISCHARGE                     | 1 (2) | 0 (0) | 1 (2) |
| VAGINAL DISCOMFORT                    | 1 (2) | 1 (2) | 0 (0) |
| VAGINAL INFECTION                     | 1 (2) | 1 (2) | 0 (0) |
| VAGINAL INFLAMMATION                  | 1 (2) | 1 (2) | 0 (0) |
| VAGINAL ITCHING                       | 1 (2) | 1 (2) | 0 (0) |
| VARICELLA-LIKE RASH                   | 1 (2) | 1 (2) | 0 (0) |
| VASCULITIS LEGS                       | 1 (2) | 1 (2) | 0 (0) |
| VEGETATIVE STATE CHRONIC              | 1 (2) | 1 (2) | 0 (0) |
| VEIN DISORDER                         | 1 (2) | 1 (2) | 0 (0) |
| VEIN PAIN                             | 1 (2) | 1 (2) | 0 (0) |
| VENTRICULAR CONTRACTIONS<br>PREMATURE | 1 (2) | 1 (2) | 0 (0) |
| VERTIGO                               | 7 (2) | 5 (2) | 2 (2) |
| VIOLENCE                              | 1 (2) | 1 (2) | 0 (0) |
| VISION BLURRED                        | 1 (2) | 1 (2) | 0 (0) |
| VISION LOSS                           | 1 (2) | 1 (2) | 0 (0) |
| VISUAL ACUITY REDUCED                 | 1 (2) | 1 (2) | 0 (0) |
| VISUAL DISTURBANCE                    | 8 (2) | 8 (2) | 0 (0) |
| VISUAL FLASHES                        | 1 (2) | 1 (2) | 0 (0) |
| VISUAL HALLUCINATIONS                 | 4 (2) | 2 (2) | 2 (2) |
| VISUAL IMPAIRMENT                     | 3 (2) | 3 (2) | 0 (0) |
| VITAMIN B12 DECREASED                 | 1 (2) | 1 (2) | 0 (0) |
| VIVID DREAMS                          | 1 (2) | 0 (0) | 1 (2) |
| VOCAL CORD DYSFUNCTION                | 1 (2) | 1 (2) | 0 (0) |

---

---

|                                 |        |        |       |
|---------------------------------|--------|--------|-------|
| VOICE ALTERATION                | 1 (2)  | 1 (2)  | 0 (0) |
| VOICE LOWERED                   | 1 (2)  | 1 (2)  | 0 (0) |
| VOMITING                        | 28 (2) | 19 (2) | 9 (2) |
| VOMITING AGGRAVATED             | 1 (2)  | 1 (2)  | 0 (0) |
| VOMITING PROJECTILE             | 2 (2)  | 1 (2)  | 1 (2) |
| WARMNESS IN EYES                | 1 (2)  | 1 (2)  | 0 (0) |
| WARTS                           | 1 (2)  | 1 (2)  | 0 (0) |
| WATER RETENTION                 | 3 (2)  | 3 (2)  | 0 (0) |
| WATERING EYES                   | 1 (2)  | 1 (2)  | 0 (0) |
| WATERY DIARRHEA                 | 1 (2)  | 0 (0)  | 1 (2) |
| WATERY DIARRHOEA                | 5 (2)  | 0 (0)  | 5 (2) |
| WEAKNESS                        | 10 (2) | 9 (2)  | 1 (2) |
| WEAKNESS GENERALISED            | 1 (2)  | 1 (2)  | 0 (0) |
| WEAKNESS LEFT OR RIGHT SIDE     | 1 (2)  | 1 (2)  | 0 (0) |
| WEIGHT LOSS                     | 1 (2)  | 1 (2)  | 0 (0) |
| WHEEZE                          | 1 (2)  | 1 (2)  | 0 (0) |
| WHEEZING                        | 6 (2)  | 4 (2)  | 2 (2) |
| WHEEZY                          | 1 (2)  | 1 (2)  | 0 (0) |
| WIND                            | 5 (2)  | 5 (2)  | 0 (0) |
| WITHDRAWAL REACTION             | 2 (2)  | 2 (2)  | 0 (0) |
| WITHDRAWAL SYMPTOM              | 3 (2)  | 3 (2)  | 0 (0) |
| WORD FINDING DIFFICULTY         | 1 (2)  | 0 (0)  | 1 (2) |
| WORSENING OF TINNITUS           | 2 (2)  | 2 (2)  | 0 (0) |
| WOUND HEALING DELAYED           | 1 (2)  | 1 (2)  | 0 (0) |
| WOUND OOZING                    | 1 (2)  | 1 (2)  | 0 (0) |
| WOUND SECRETION                 | 1 (2)  | 1 (2)  | 0 (0) |
| WOUND WEEPING                   | 2 (2)  | 2 (2)  | 0 (0) |
| WRIST PAIN                      | 1 (2)  | 0 (0)  | 1 (2) |
| WRONG DIRECTIONS TYPED ON LABEL | 1 (2)  | 1 (2)  | 0 (0) |
| YAWNING                         | 2 (2)  | 0 (0)  | 2 (2) |

---
